# Supplementary material for: Evaluation of a cadaveric wrist motion simulator using marker-based X-ray reconstruction of moving morphology
Source: PeerJ journal article supplement (doi:10.7717/peerj.17179), 2024-05-24
Supplement: Supplementary_Material.pdf [file Supplementary_Material.pdf]

# Evaluation of a Cadaveric Wrist Motion Simulator using Marker-Based X-Ray Reconstruction of Moving Morphology: Supplementary Material

Table S1: Pre- and post- surgery wrist angles ( $^{\circ}$ ) in the starting positions of all planar motions. The X-Axis corresponds to pronation (+) and supination (-), the Y-Axis to flexion (+) and extension (-), the Z-Axis to ulnar (+) and radial (-) deviation. Angles are reported as the mean  $\pm$  standard deviation. Statistically significant differences between anatomical and Motec wrists are indicated by a p-value  $< 0.05$ ). N = 6.

|               |                   | Initial Wrist Positions ( $^{\circ}$ ) |                 |                  |                 |                  |                 |
|---------------|-------------------|----------------------------------------|-----------------|------------------|-----------------|------------------|-----------------|
|               |                   | Flexion                                | Extension       | Radial Deviation | Ulnar Deviation | Radial Extension | Ulnar Flexion   |
| <b>X-Axis</b> | <i>Anatomical</i> | 3.5 $\pm$ 3.8                          | 3.0 $\pm$ 3.7   | 3.0 $\pm$ 5.3    | 3.3 $\pm$ 5.2   | 2.8 $\pm$ 4.0    | 3.6 $\pm$ 3.8   |
|               | <i>Motec</i>      | 3.1 $\pm$ 6.0                          | 2.5 $\pm$ 5.7   | 2.8 $\pm$ 6.2    | 2.2 $\pm$ 6.5   | 2.0 $\pm$ 5.7    | 2.3 $\pm$ 7.2   |
|               | <i>P-Value</i>    | 0.873                                  | 0.812           | 0.951            | 0.623           | 0.734            | 0.627           |
| <b>Y-Axis</b> | <i>Anatomical</i> | -10.9 $\pm$ 6.7                        | -9.8 $\pm$ 4.7  | -11.9 $\pm$ 5.0  | -11.3 $\pm$ 6.7 | -11.4 $\pm$ 5.2  | -11.1 $\pm$ 6.1 |
|               | <i>Motec</i>      | -8.7 $\pm$ 9.1                         | -11.1 $\pm$ 7.3 | -9.6 $\pm$ 7.7   | -8.9 $\pm$ 8.4  | -10.8 $\pm$ 7.4  | -8.9 $\pm$ 8.6  |
|               | <i>P-Value</i>    | 0.245                                  | 0.323           | 0.143            | 0.083           | 0.583            | 0.201           |
| <b>Z-Axis</b> | <i>Anatomical</i> | -0.7 $\pm$ 6.9                         | -0.4 $\pm$ 6.9  | 1.0 $\pm$ 7.5    | 0.4 $\pm$ 7.2   | 1.2 $\pm$ 7.3    | -0.2 $\pm$ 7.2  |
|               | <i>Motec</i>      | 1.0 $\pm$ 7.9                          | 1.6 $\pm$ 8.0   | 1.4 $\pm$ 8.0    | 1.7 $\pm$ 8.2   | 1.9 $\pm$ 7.4    | 1.7 $\pm$ 8.0   |
|               | <i>P-Value</i>    | 0.268                                  | 0.146           | 0.742            | 0.235           | 0.587            | 0.142           |

Table S2: Mean inter-specimen RMSEs ( $\pm$ standard deviation) of wrist angle ( $^{\circ}$ ) profiles in the X, Y and Z axes of the radial coordinate system. Highlighted cells indicate the axis with the maximum error during each motion (n = 6)

|                      | Mean Intra-Specimen RMSE ( $^{\circ}$ ) |                 |                 |                 |                 |                 |
|----------------------|-----------------------------------------|-----------------|-----------------|-----------------|-----------------|-----------------|
|                      | Anatomical                              |                 |                 | Motec           |                 |                 |
|                      | <i>X-Axis</i>                           | <i>Y-Axis</i>   | <i>Z Axis</i>   | <i>X-Axis</i>   | <i>Y-Axis</i>   | <i>Z Axis</i>   |
| <b>Flexion</b>       | 3.97 $\pm$ 3.01                         | 4.46 $\pm$ 2.11 | 4.67 $\pm$ 2.24 | 6.13 $\pm$ 3.12 | 5.45 $\pm$ 4.10 | 5.06 $\pm$ 3.62 |
| <b>Extension</b>     | 2.95 $\pm$ 1.77                         | 5.57 $\pm$ 2.47 | 4.67 $\pm$ 4.42 | 4.56 $\pm$ 3.25 | 10.7 $\pm$ 5.00 | 7.12 $\pm$ 6.05 |
| <b>RD</b>            | 3.95 $\pm$ 2.61                         | 5.12 $\pm$ 2.48 | 6.22 $\pm$ 3.44 | 6.00 $\pm$ 4.14 | 6.32 $\pm$ 5.72 | 7.28 $\pm$ 7.21 |
| <b>UD</b>            | 3.98 $\pm$ 2.95                         | 5.00 $\pm$ 4.64 | 5.17 $\pm$ 2.95 | 5.43 $\pm$ 2.11 | 8.60 $\pm$ 4.64 | 5.60 $\pm$ 4.32 |
| <b>RE</b>            | 4.22 $\pm$ 2.57                         | 7.85 $\pm$ 3.91 | 5.45 $\pm$ 4.65 | 8.16 $\pm$ 5.59 | 12.9 $\pm$ 6.42 | 7.11 $\pm$ 5.00 |
| <b>UF</b>            | 3.18 $\pm$ 2.36                         | 5.61 $\pm$ 2.52 | 6.05 $\pm$ 2.39 | 6.29 $\pm$ 3.49 | 5.79 $\pm$ 3.57 | 5.54 $\pm$ 3.51 |
| <b>Circumduction</b> | 4.65 $\pm$ 2.25                         | 7.07 $\pm$ 2.19 | 5.64 $\pm$ 2.54 | 7.87 $\pm$ 3.50 | 11.5 $\pm$ 5.05 | 7.32 $\pm$ 4.24 |

Table S3: Mean inter-specimen RMSEs ( $\pm$ standard deviation) of the force (N) profiles of ECU, ECRB, ECRL, FCR and FCU. Highlighted cells indicate the tendon with the maximum error during each motion (n = 6)

|                      | Mean Intra-Specimen RMSE (N) |                 |                 |                 |                 |                 |                 |                 |                 |                 |
|----------------------|------------------------------|-----------------|-----------------|-----------------|-----------------|-----------------|-----------------|-----------------|-----------------|-----------------|
|                      | Anatomical                   |                 |                 |                 |                 | Motec           |                 |                 |                 |                 |
|                      | <i>ECU</i>                   | <i>ECRB</i>     | <i>ECRL</i>     | <i>FCR</i>      | <i>FCU</i>      | <i>ECU</i>      | <i>ECRB</i>     | <i>ECRL</i>     | <i>FCR</i>      | <i>FCU</i>      |
| <b>Flexion</b>       | 0.36 $\pm$ 0.21              | 0.57 $\pm$ 0.27 | 0.23 $\pm$ 0.12 | 2.84 $\pm$ 0.75 | 3.49 $\pm$ 1.45 | 0.42 $\pm$ 0.24 | 1.57 $\pm$ 0.78 | 0.52 $\pm$ 0.39 | 1.76 $\pm$ 1.25 | 2.54 $\pm$ 0.77 |
|                      | 4.85 $\pm$ 2.31              | 4.52 $\pm$ 2.79 | 3.39 $\pm$ 1.52 | 0.31 $\pm$ 0.16 | 0.33 $\pm$ 0.17 | 5.39 $\pm$ 4.19 | 4.16 $\pm$ 2.26 | 6.25 $\pm$ 3.78 | 0.51 $\pm$ 0.27 | 0.57 $\pm$ 0.21 |
| <b>RD</b>            | 1.16 $\pm$ 0.36              | 3.09 $\pm$ 2.40 | 5.94 $\pm$ 2.58 | 4.10 $\pm$ 1.84 | 0.48 $\pm$ 0.22 | 1.36 $\pm$ 0.44 | 3.61 $\pm$ 1.55 | 8.45 $\pm$ 4.26 | 5.22 $\pm$ 4.17 | 0.60 $\pm$ 0.38 |
|                      | 3.97 $\pm$ 2.93              | 0.37 $\pm$ 0.27 | 0.44 $\pm$ 0.18 | 0.21 $\pm$ 0.09 | 1.82 $\pm$ 1.14 | 7.21 $\pm$ 3.59 | 0.47 $\pm$ 0.21 | 0.54 $\pm$ 0.24 | 0.23 $\pm$ 0.07 | 1.44 $\pm$ 1.24 |
| <b>RE</b>            | 3.05 $\pm$ 1.79              | 5.74 $\pm$ 1.70 | 6.23 $\pm$ 4.22 | 9.29 $\pm$ 3.61 | 0.37 $\pm$ 0.14 | 3.95 $\pm$ 2.36 | 4.40 $\pm$ 1.73 | 9.14 $\pm$ 7.54 | 5.30 $\pm$ 3.23 | 0.83 $\pm$ 0.43 |
|                      | 1.50 $\pm$ 0.50              | 2.09 $\pm$ 1.02 | 0.24 $\pm$ 0.13 | 0.57 $\pm$ 0.41 | 3.05 $\pm$ 1.23 | 1.00 $\pm$ 0.43 | 1.07 $\pm$ 0.63 | 0.47 $\pm$ 0.34 | 0.68 $\pm$ 0.58 | 3.13 $\pm$ 0.99 |
| <b>Circumduction</b> | 5.49 $\pm$ 2.09              | 3.30 $\pm$ 1.60 | 5.02 $\pm$ 3.43 | 3.48 $\pm$ 2.28 | 3.98 $\pm$ 1.48 | 5.90 $\pm$ 1.89 | 4.61 $\pm$ 2.51 | 8.41 $\pm$ 3.33 | 1.84 $\pm$ 1.29 | 3.79 $\pm$ 1.55 |

Table S4: Mean inter-specimen RMSEs ( $\pm$ standard deviation) of the actuator displacement (mm) profiles of ECU, ECRB, ECRL, FCR and FCU tendons. Highlighted cells indicate the tendon with the maximum error during each motion (n = 6)

|                      | Mean Intra-Specimen RMSE (mm) |                 |                 |                 |                 |
|----------------------|-------------------------------|-----------------|-----------------|-----------------|-----------------|
|                      | <i>ECU</i>                    | <i>ECRB</i>     | <i>ECRL</i>     | <i>FCR</i>      | <i>FCU</i>      |
| <b>Flexion</b>       | 0.56 $\pm$ 0.18               | 0.56 $\pm$ 0.18 | 0.57 $\pm$ 0.17 | 1.59 $\pm$ 0.31 | 1.07 $\pm$ 0.57 |
| <b>Extension</b>     | 0.61 $\pm$ 0.40               | 0.69 $\pm$ 0.08 | 0.64 $\pm$ 0.37 | 0.62 $\pm$ 0.05 | 0.62 $\pm$ 0.05 |
| <b>RD</b>            | 0.55 $\pm$ 0.27               | 0.62 $\pm$ 0.56 | 0.97 $\pm$ 0.62 | 0.83 $\pm$ 0.55 | 0.55 $\pm$ 0.27 |
| <b>UD</b>            | 0.28 $\pm$ 0.26               | 0.11 $\pm$ 0.10 | 0.11 $\pm$ 0.10 | 0.11 $\pm$ 0.10 | 1.92 $\pm$ 0.79 |
| <b>RE</b>            | 0.51 $\pm$ 0.46               | 1.00 $\pm$ 0.99 | 1.23 $\pm$ 1.14 | 4.20 $\pm$ 2.04 | 0.49 $\pm$ 0.49 |
| <b>UF</b>            | 1.64 $\pm$ 0.61               | 1.21 $\pm$ 1.15 | 0.48 $\pm$ 0.44 | 1.80 $\pm$ 1.52 | 0.79 $\pm$ 0.64 |
| <b>Circumduction</b> | 1.35 $\pm$ 1.08               | 1.05 $\pm$ 0.84 | 1.60 $\pm$ 1.41 | 2.81 $\pm$ 1.00 | 2.69 $\pm$ 0.54 |

The following graphs show the wrist angles, tendon forces and actuator displacements during the an average trial from every motion and specimen before (A, C & E) and after (B, D & F) a total wrist replacement. This excludes the radial extension trial of specimen 1, which is included as a representative trial in the main text. For every figure **A&B** correspond to angles ( $^{\circ}$ ) of the third metacarpal with respect to the radius, represented by rotations about the X (pronation/supination), Y (flexion/extension) and Z (radioulnar deviation) axes of the radial coordinate system. **C&D** correspond to forces (N) applied to the ECU, ECRB, ECRL, FCU and FCR tendons over the duration of the motion trial. **E&F** correspond to displacements (mm) of the five linear actuators connected to the tendons over the duration of the motion trial. The mean (s.d.) angle/force/displacement is plotted at every time point. Standard deviations are represented as a shaded region around the means ( $n = 5$ ).

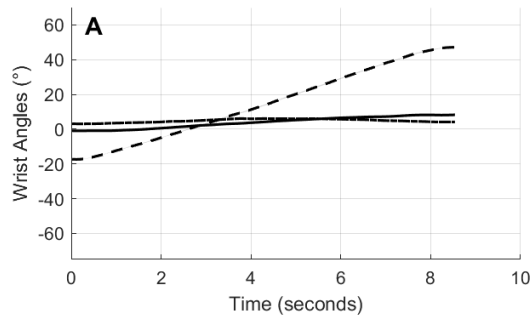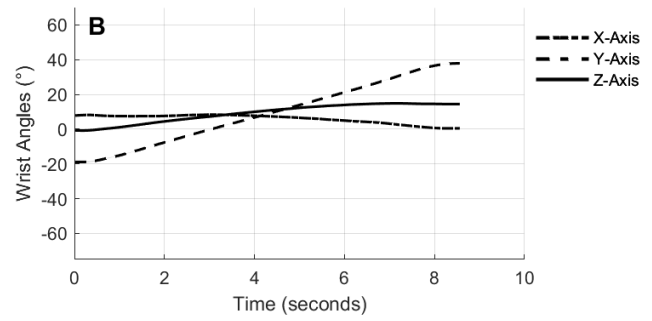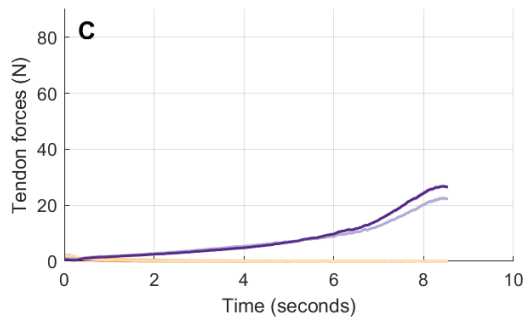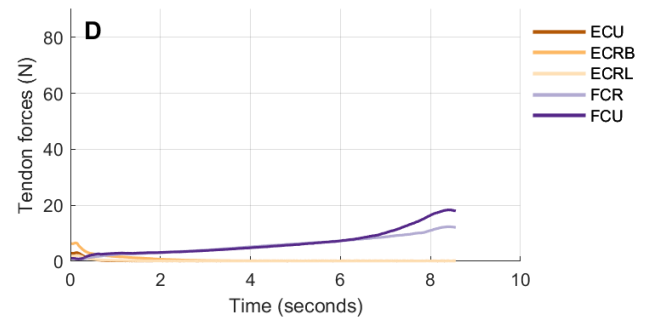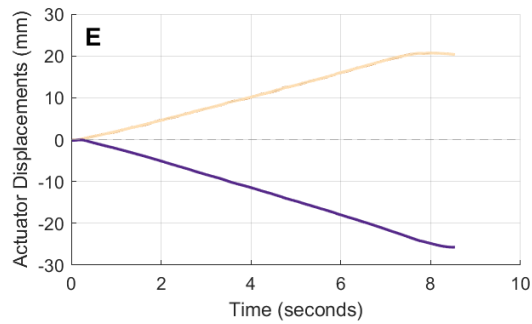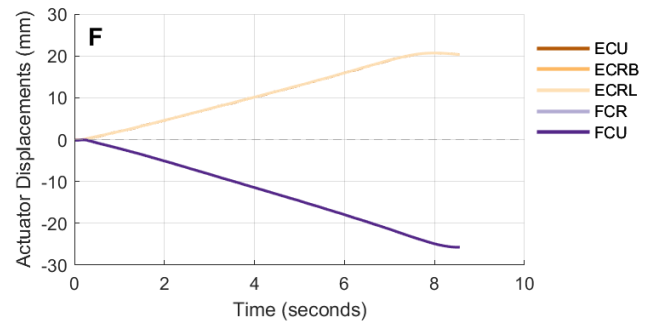

Figure S1: Average flexion trial of specimen 1.

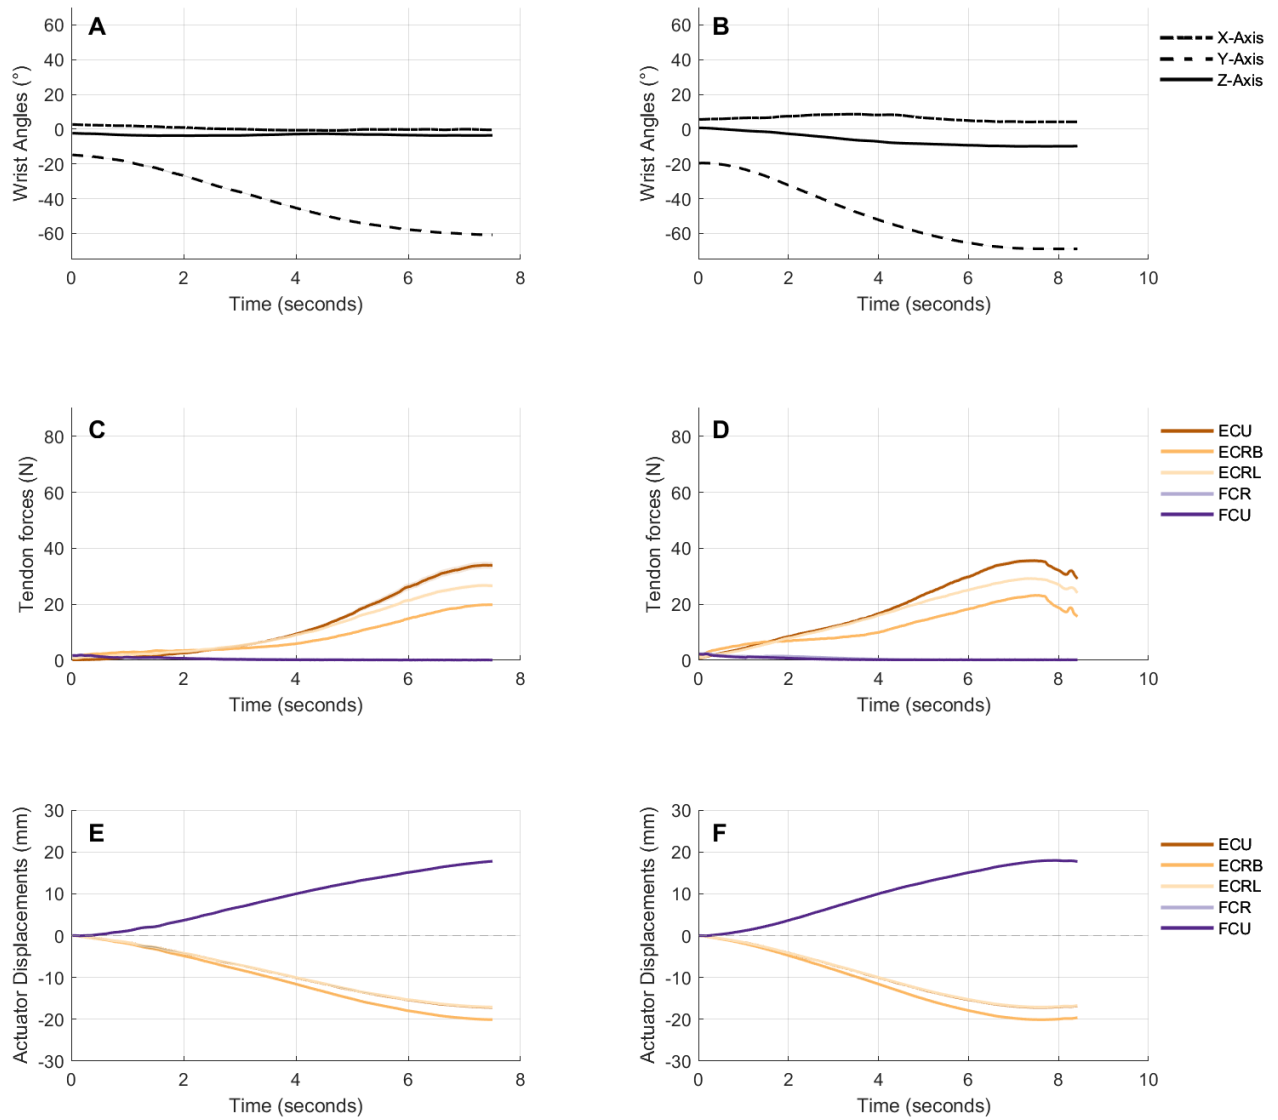

Figure S2: Average extension trial of specimen 1.

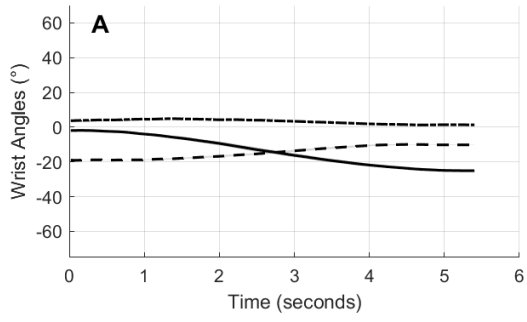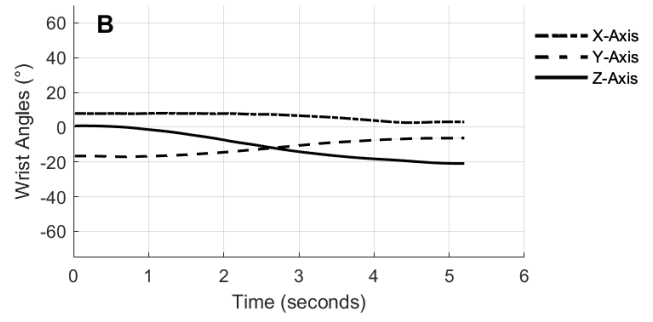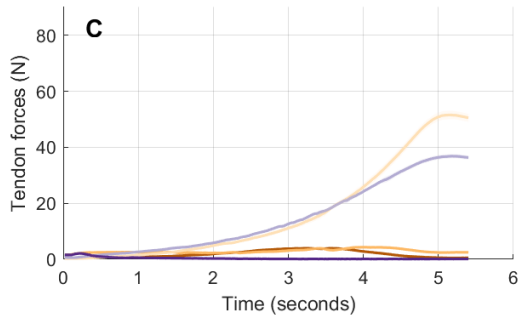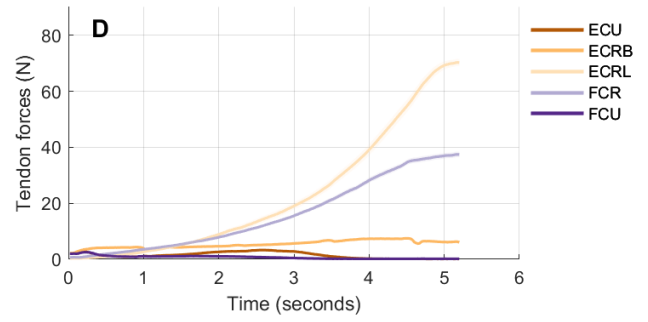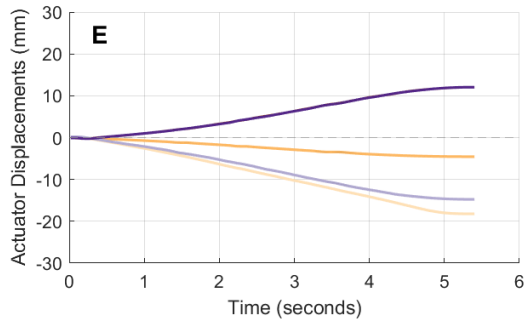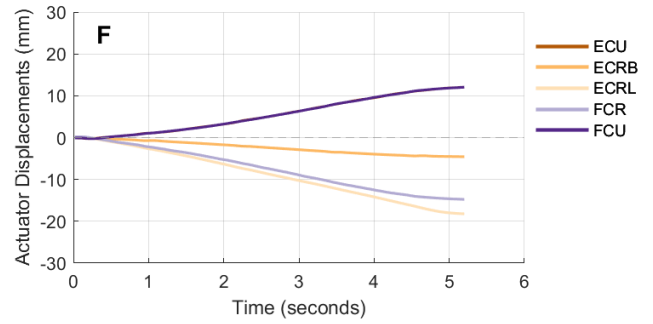

Figure S3: Average radial deviation trial of specimen 1.

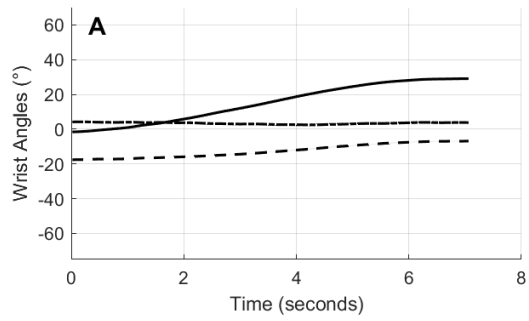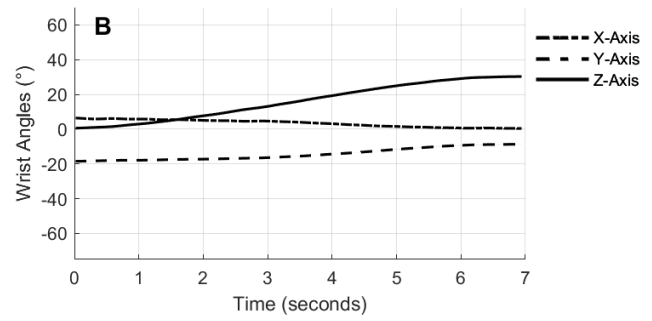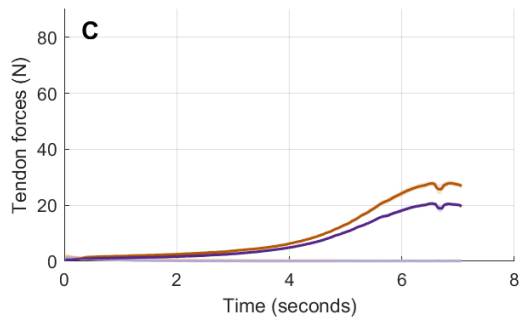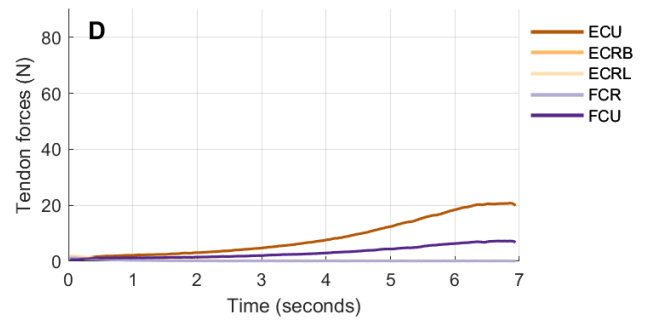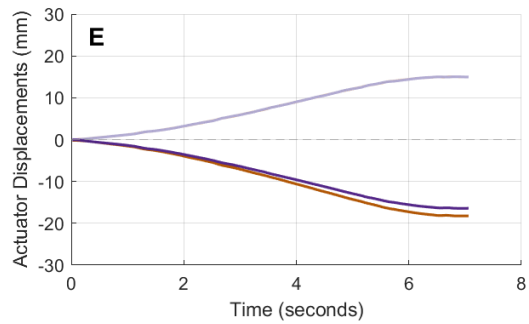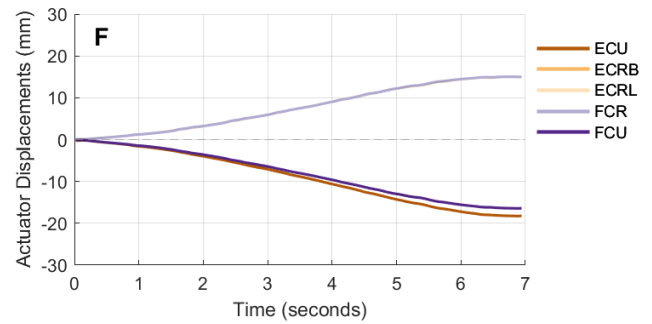

Figure S4: Average ulnar deviation trial of specimen 1.

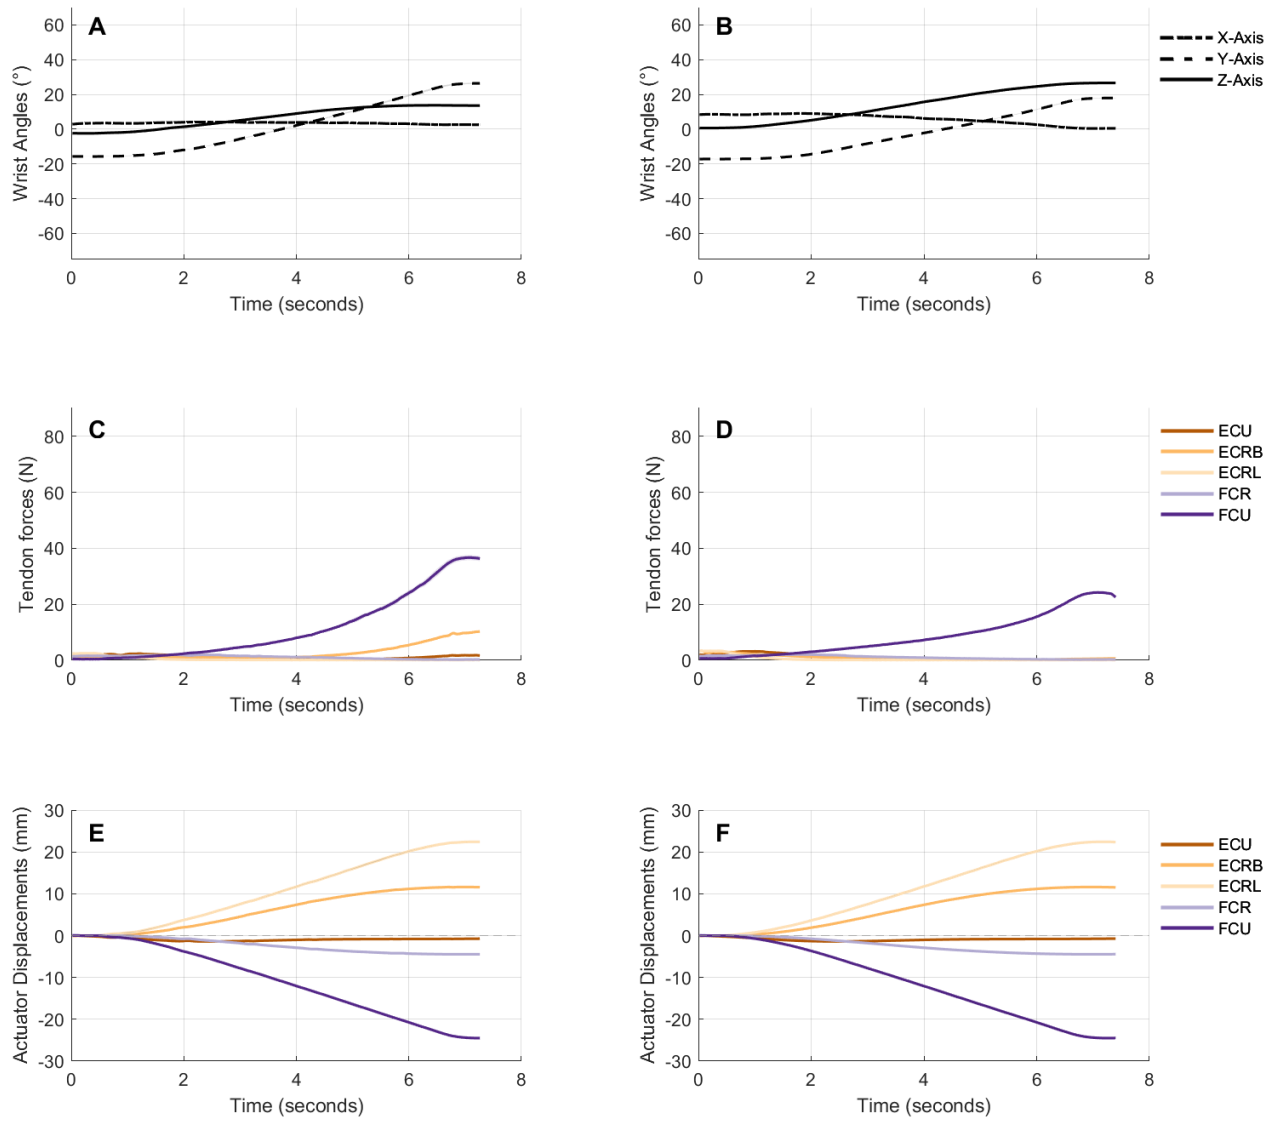

Figure S5: Average ulnar flexion trial of specimen 1.



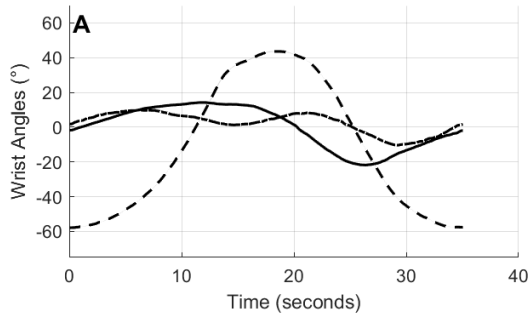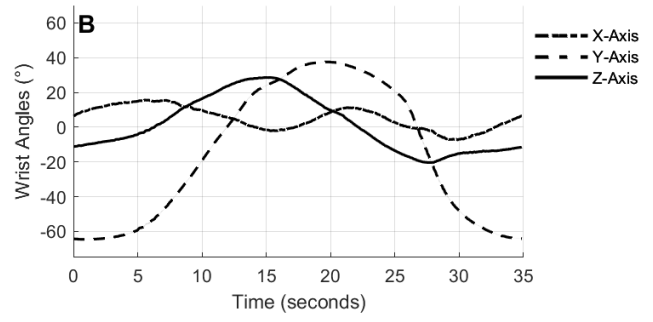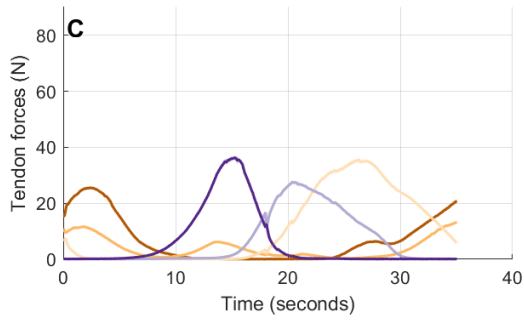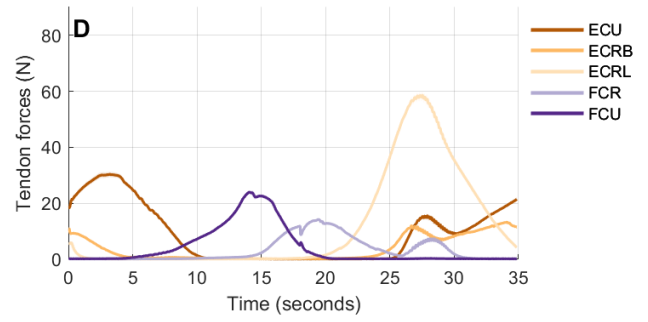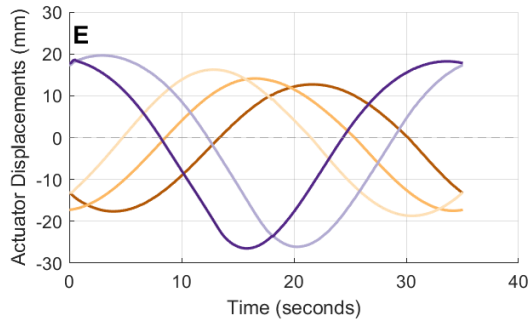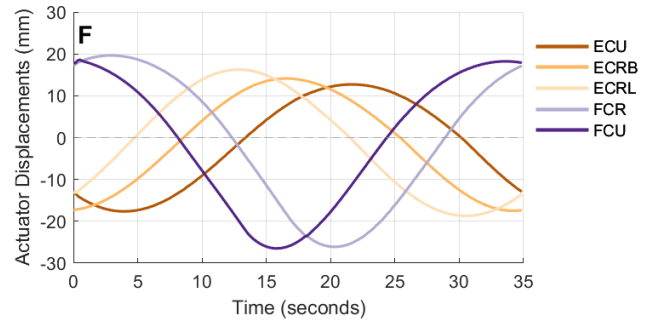

Figure S6: Average circumduction trial of specimen 1.

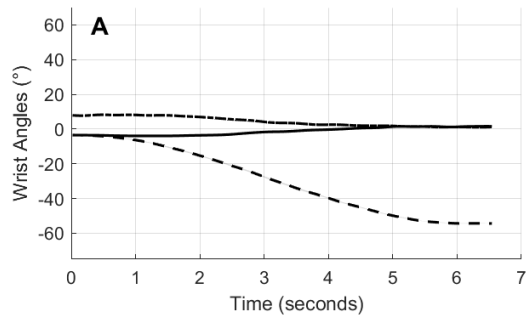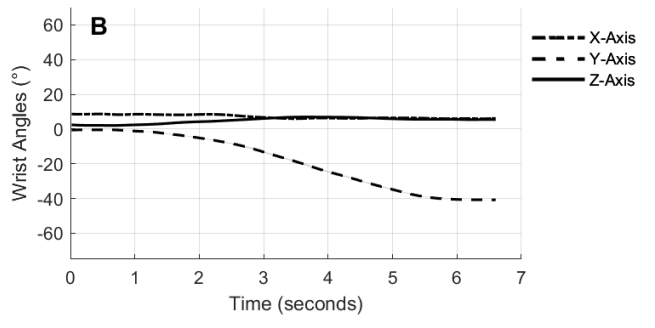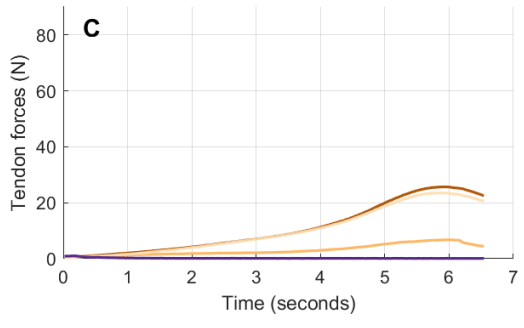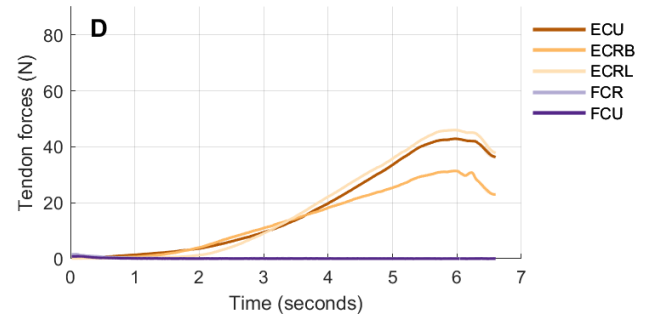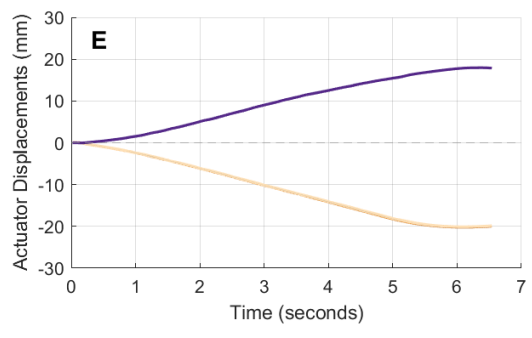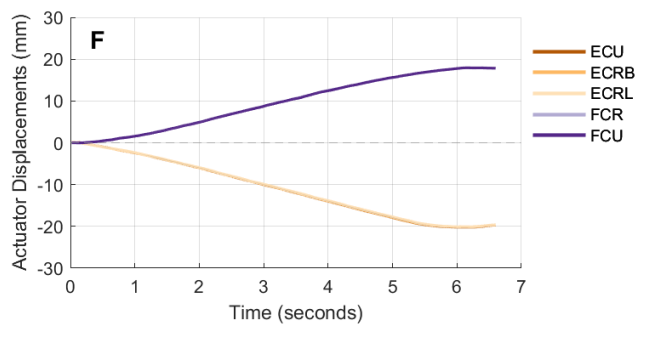

Figure S7: Average extension trial of specimen 2.

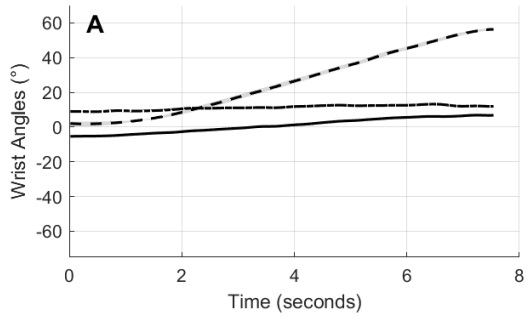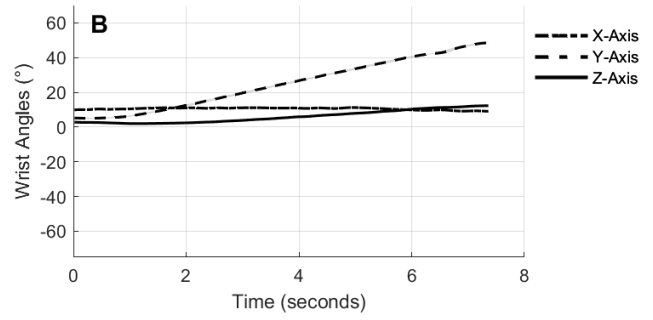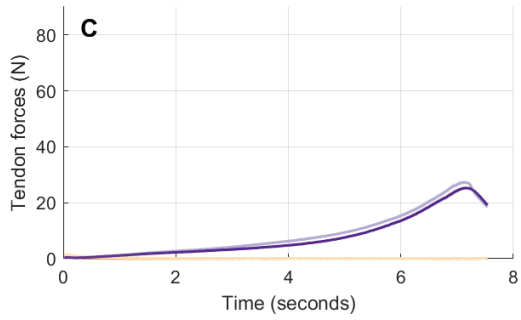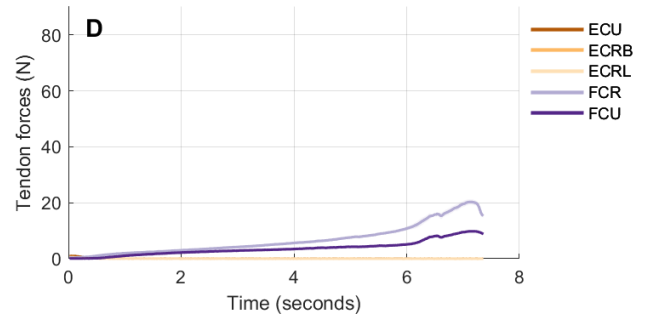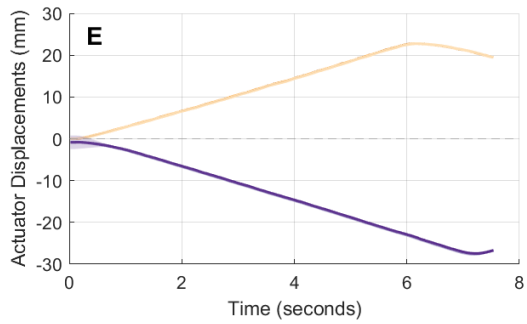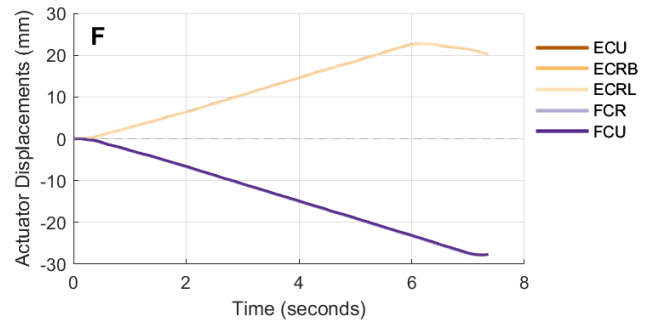

Figure S8: Average flexion trial of specimen 2.

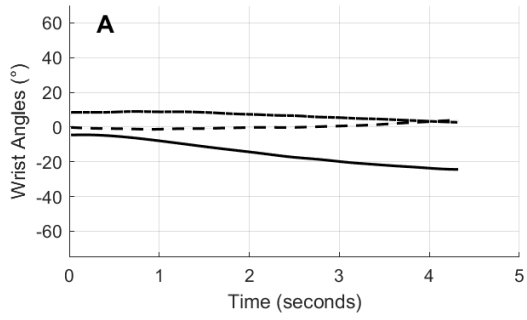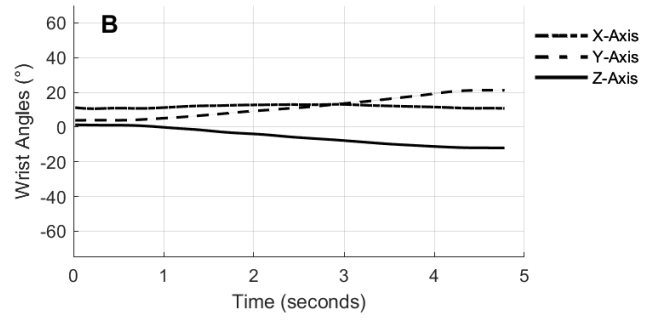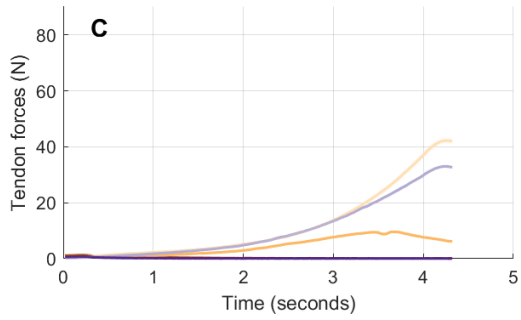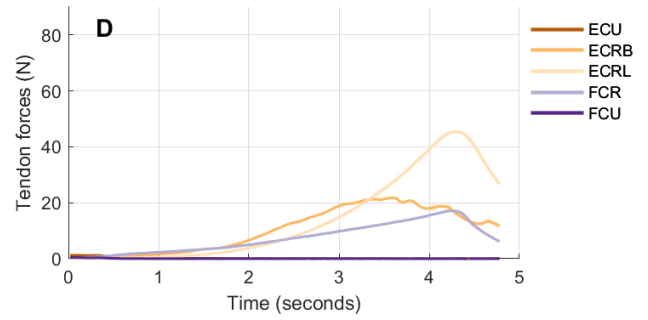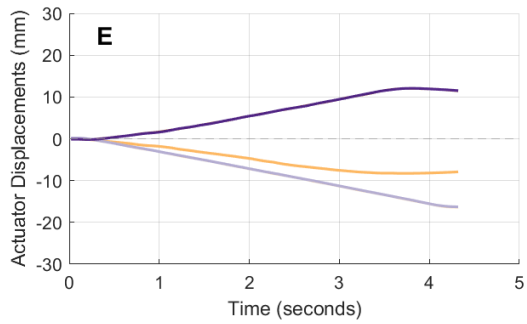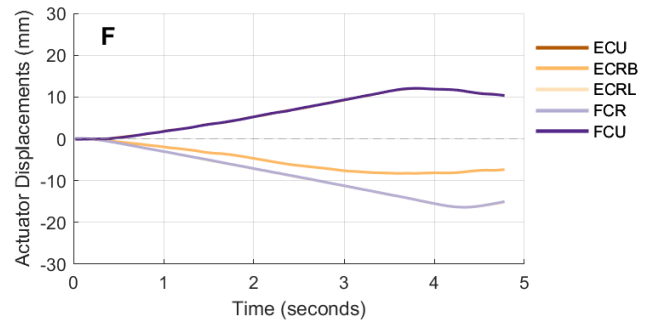

Figure S9: Average radial deviation trial of specimen 2.

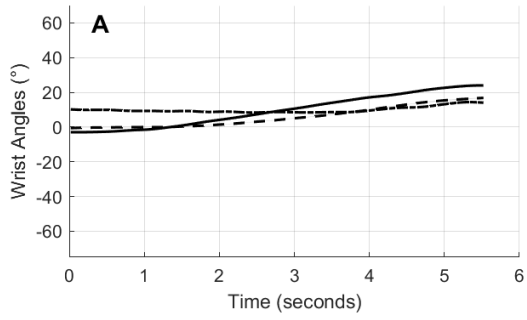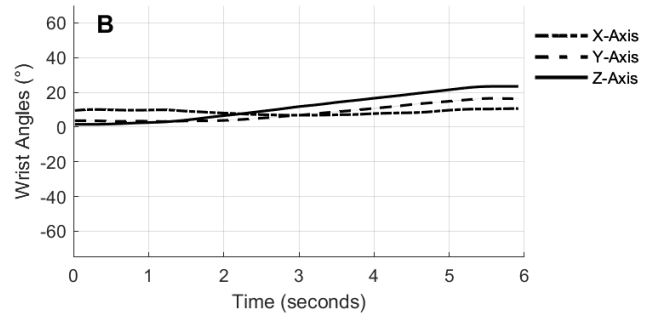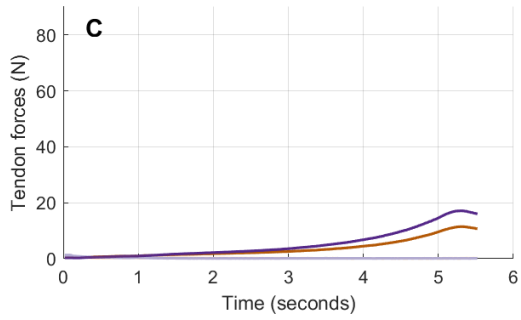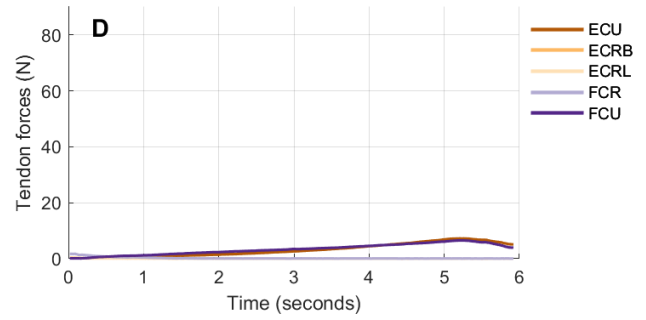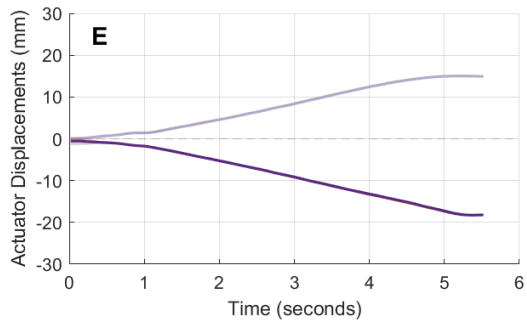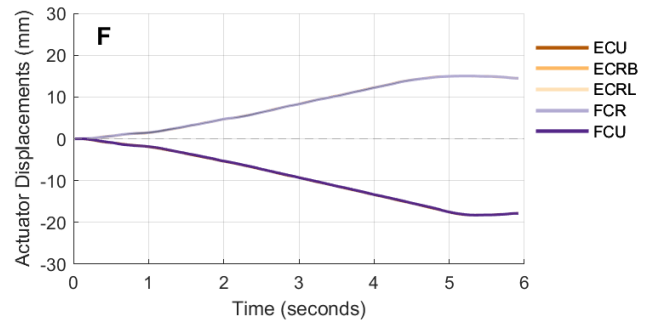

Figure S10: Average ulnar deviation trial of specimen 2.

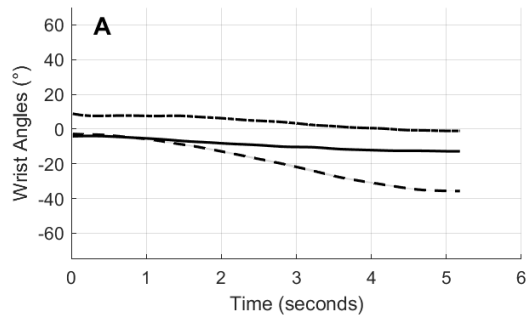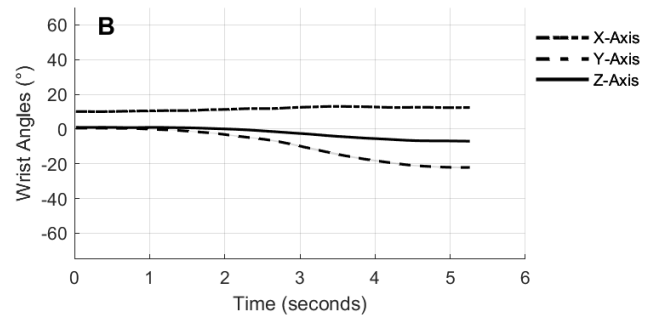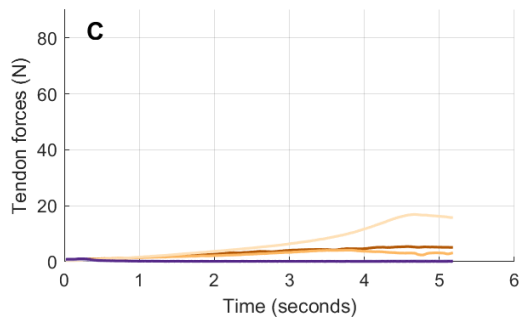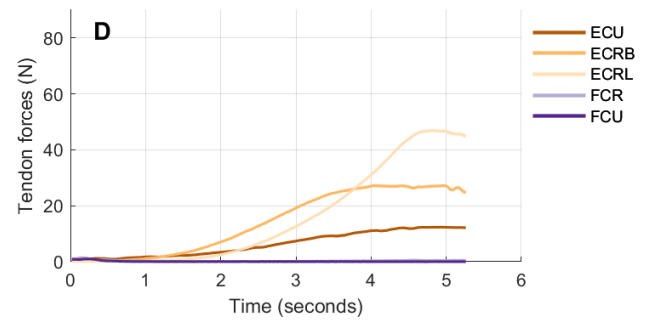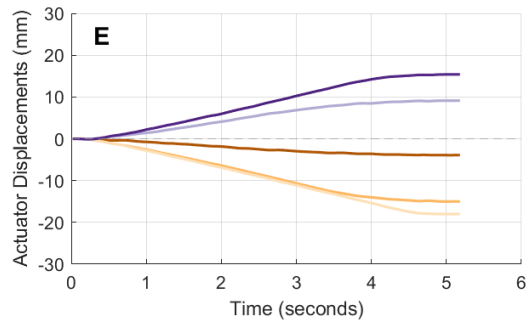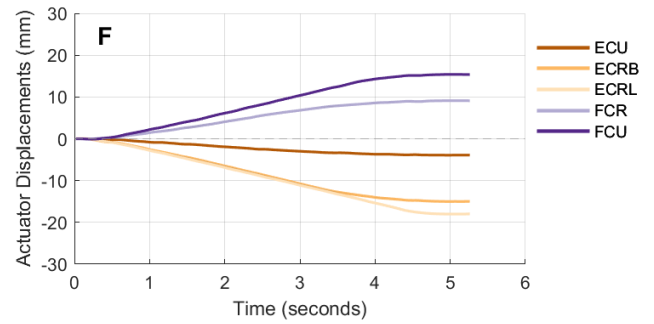

Figure S11: Average radial extension trial of specimen 2.

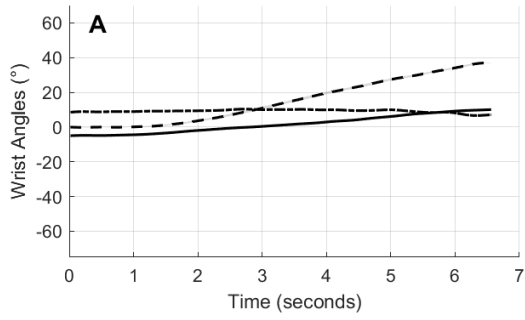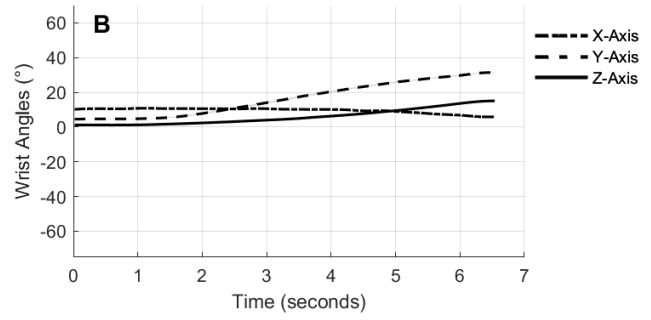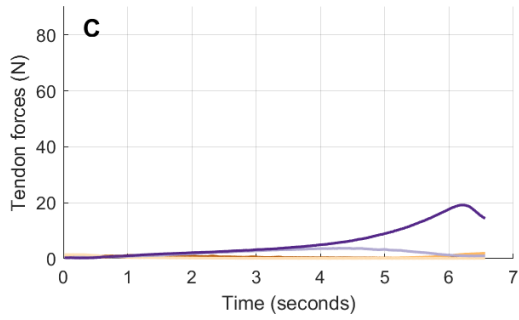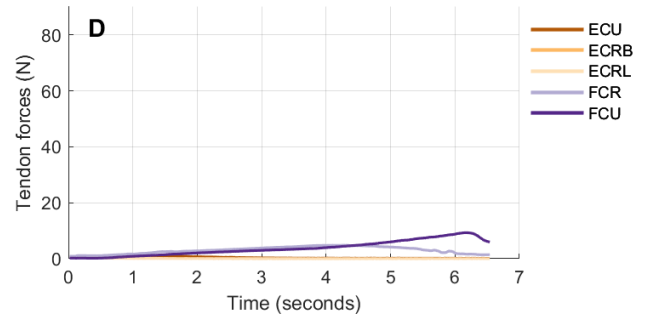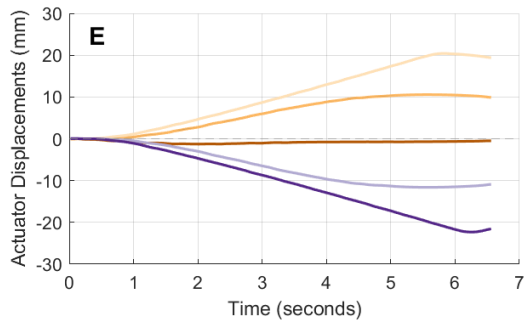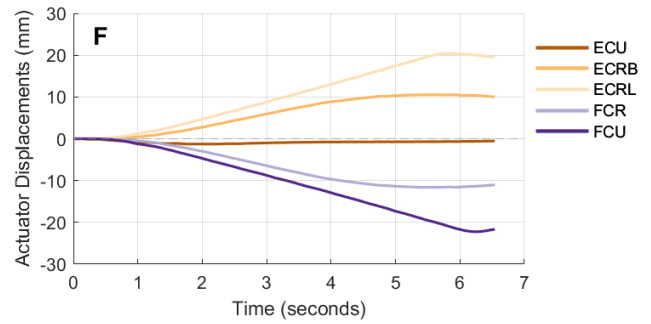

Figure S12: Average ulnar flexion trial of specimen 2.

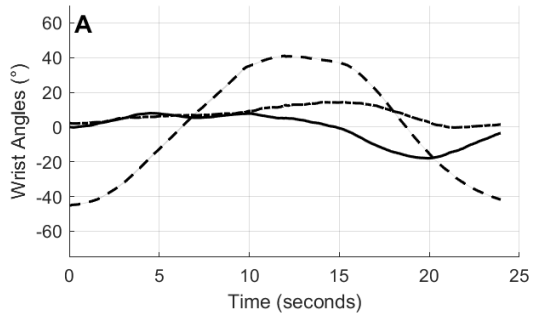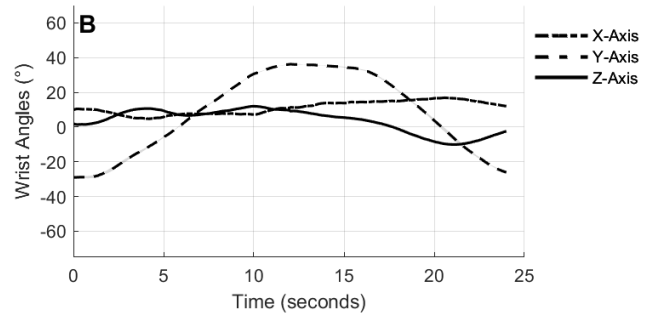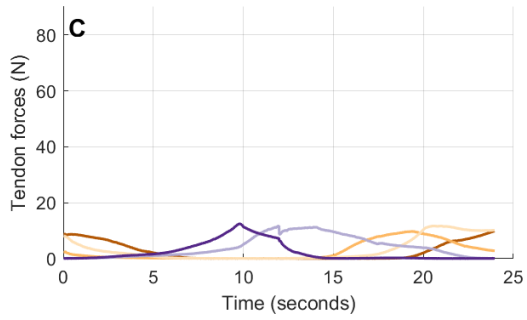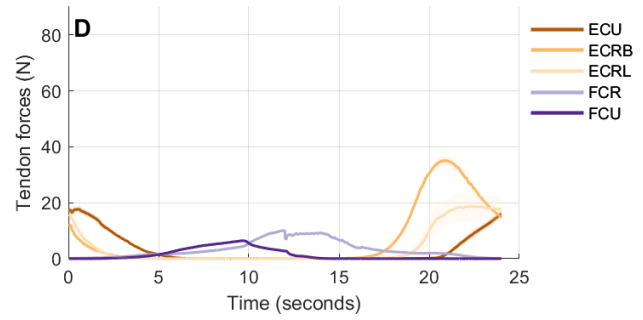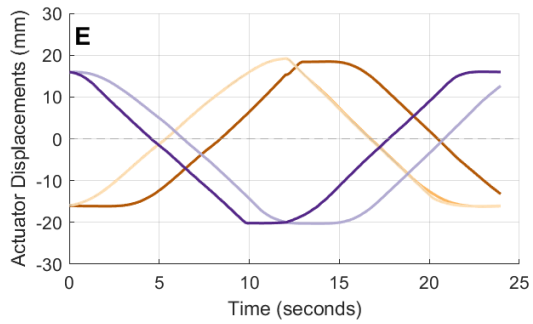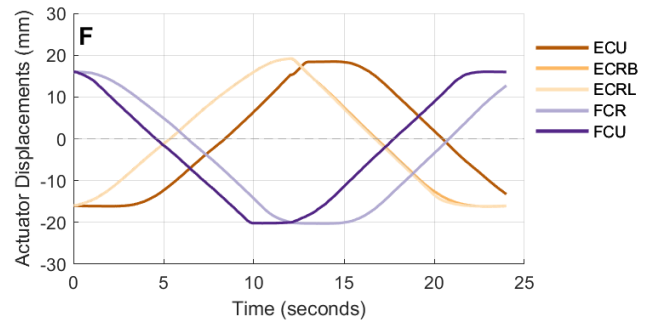

Figure S13: Average circumduction trial of specimen 2.



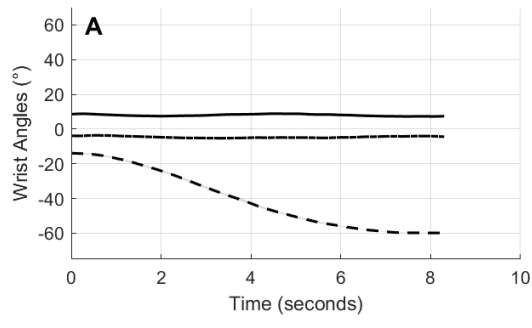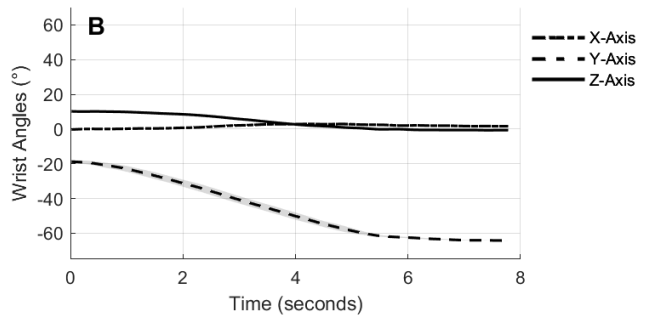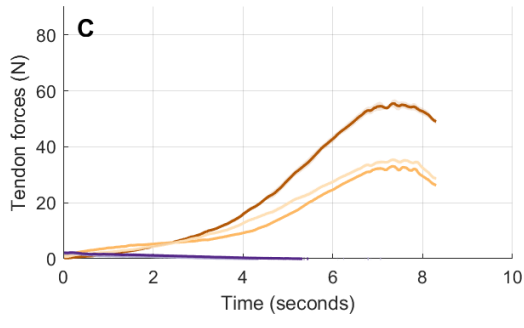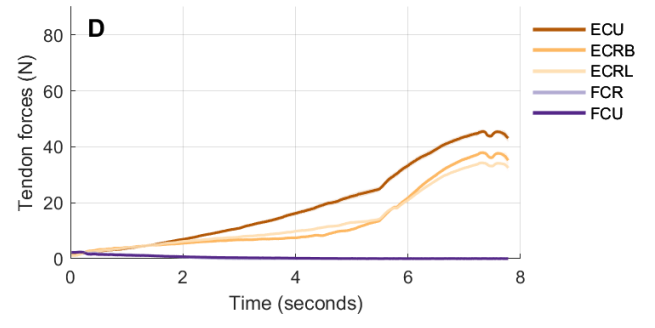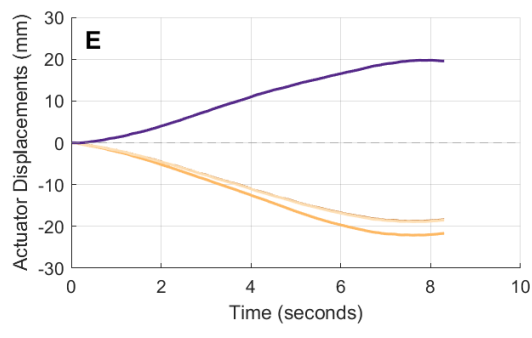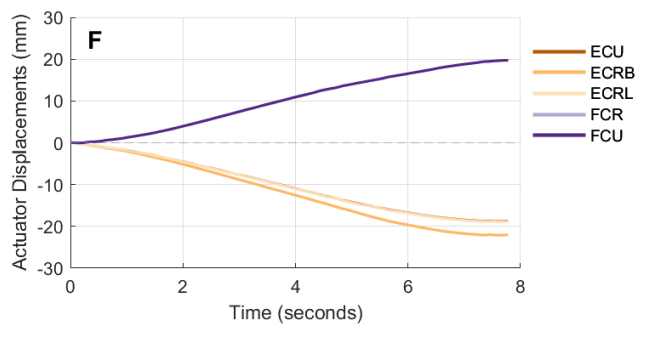

Figure S14: Average extension trial of specimen 3.

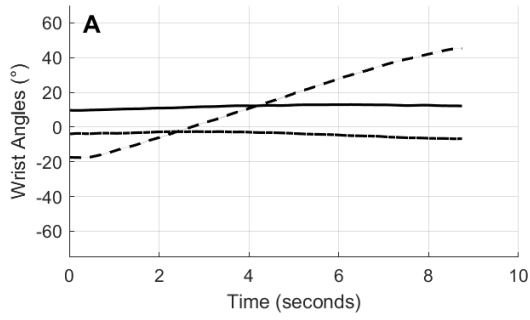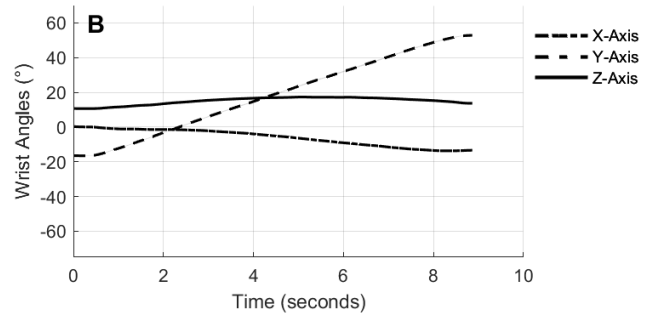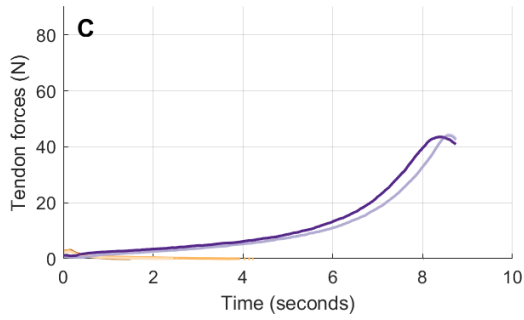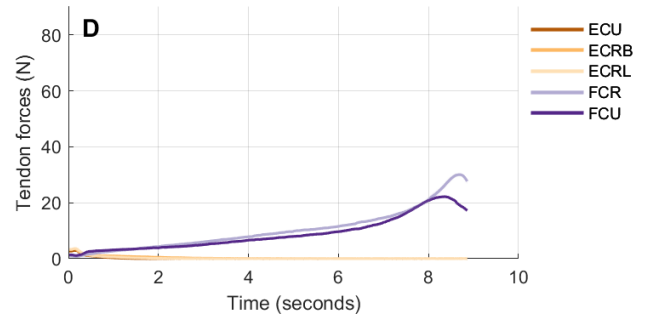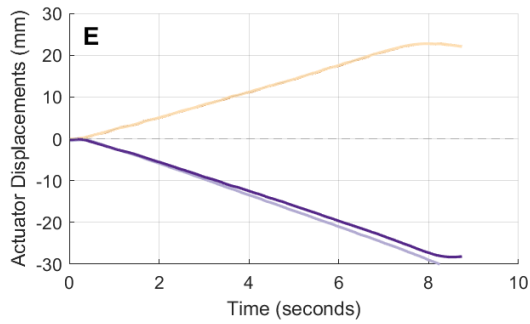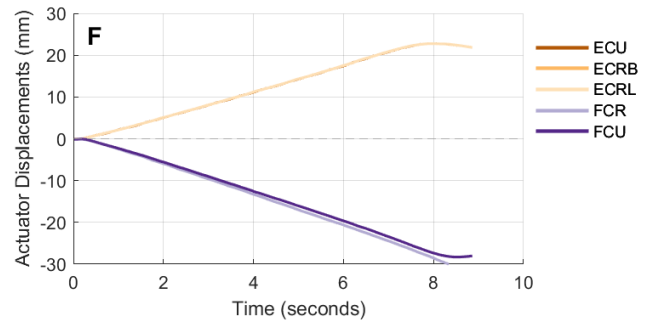

Figure S15: Average flexion trial of specimen 3.

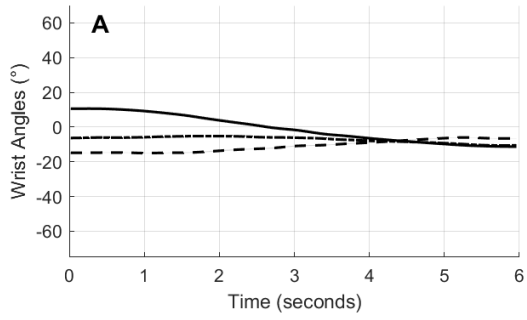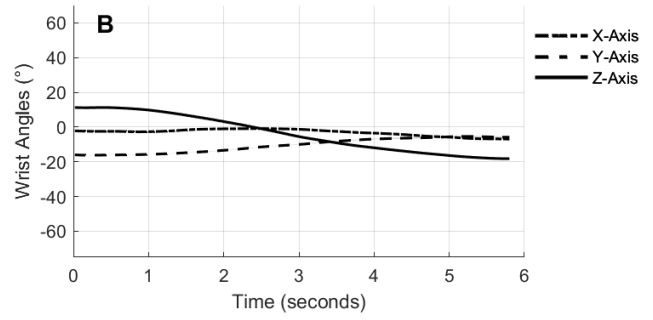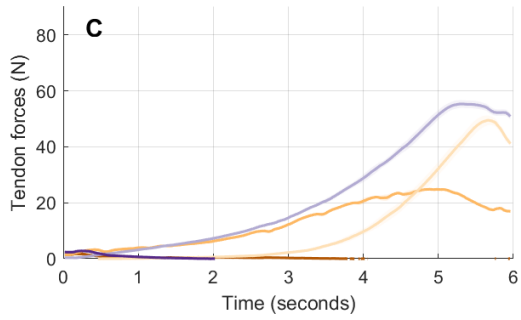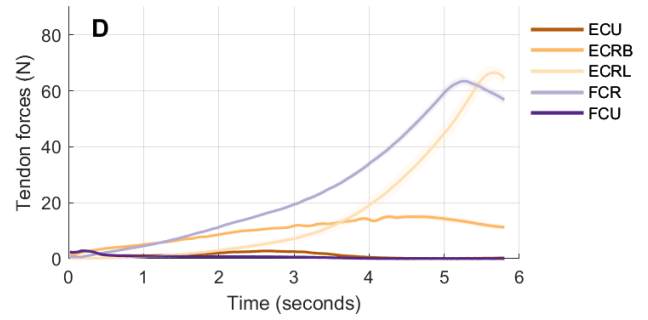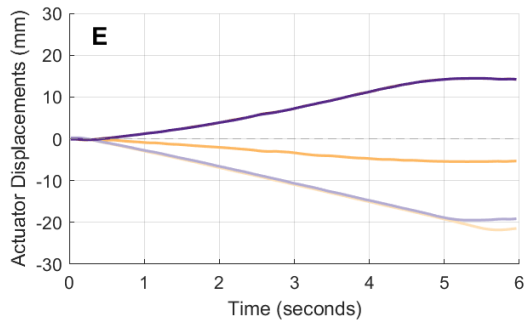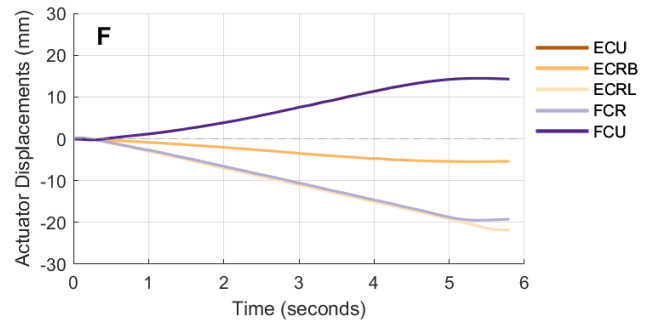

Figure S16: Average radial deviation trial of specimen 3.

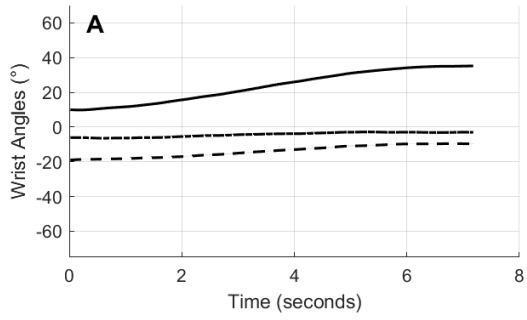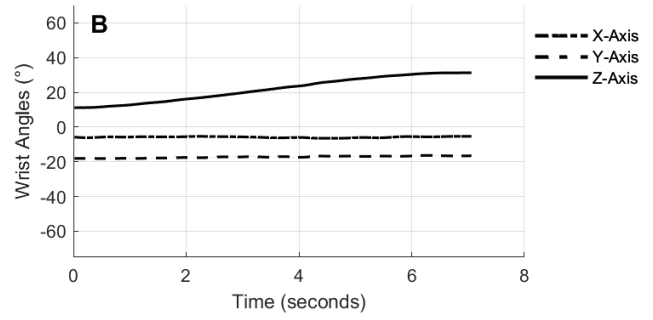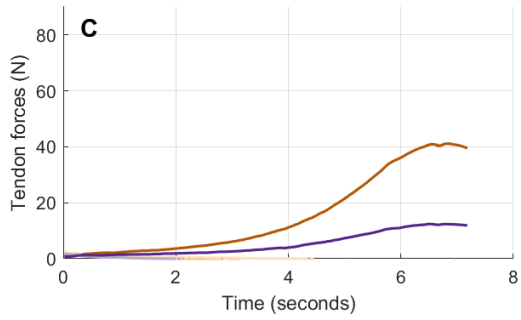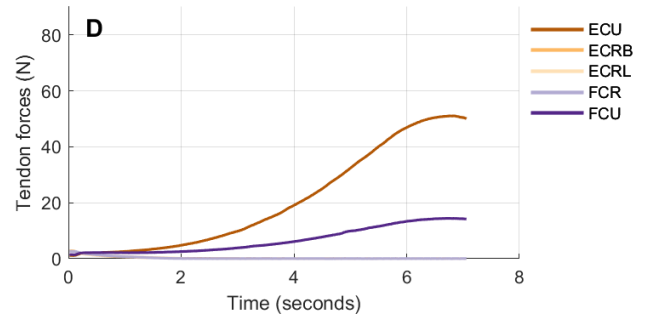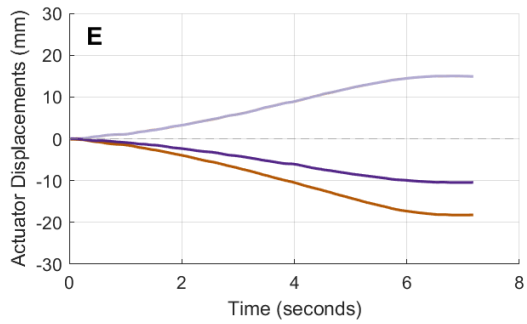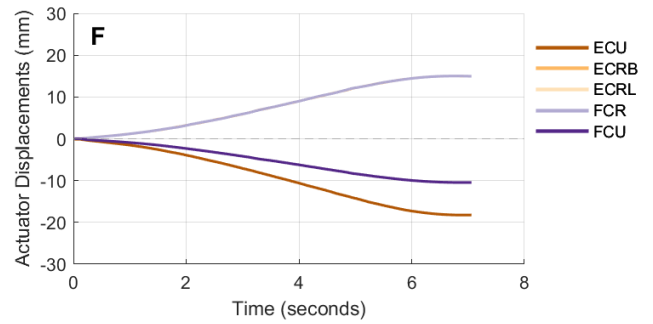

Figure S17: Average ulnar deviation trial of specimen 3.

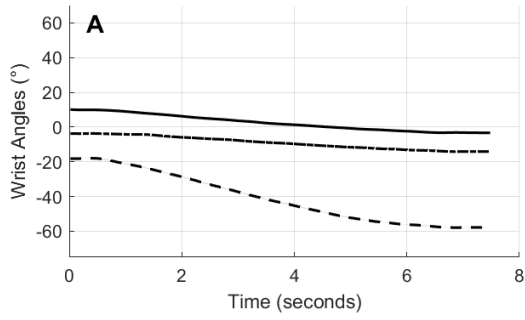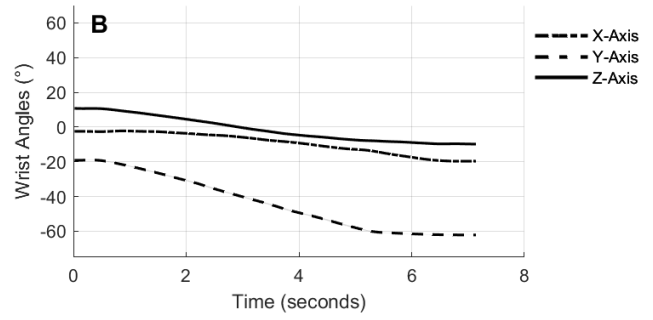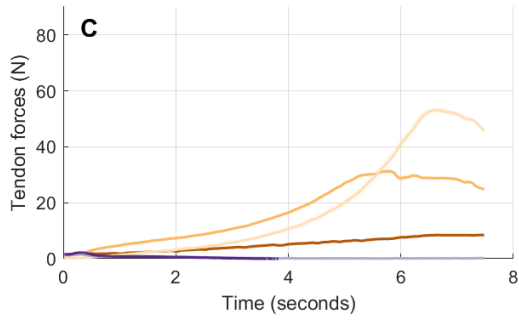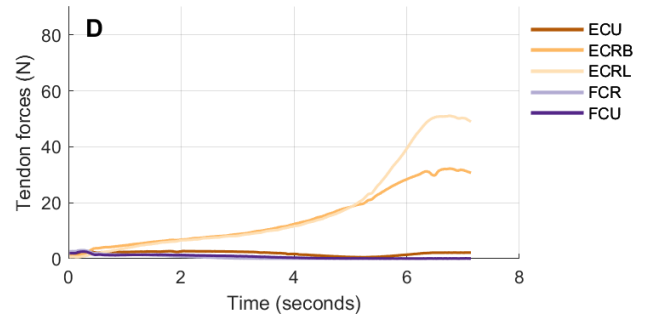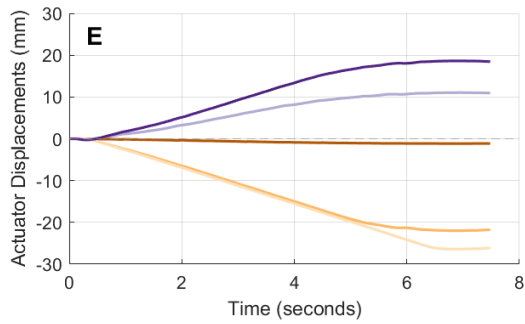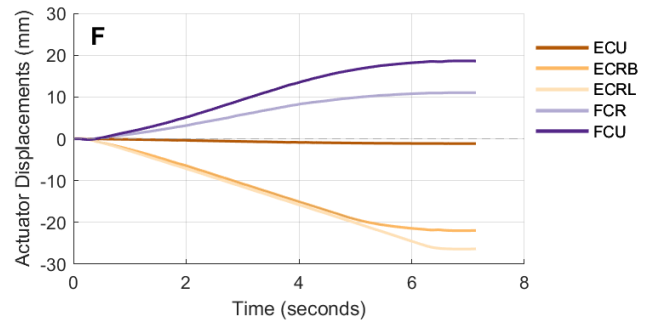

Figure S18: Average radial extension trial of specimen 3.

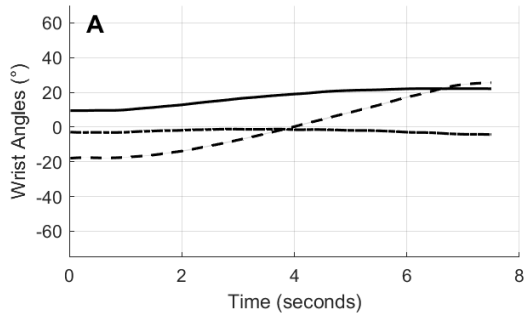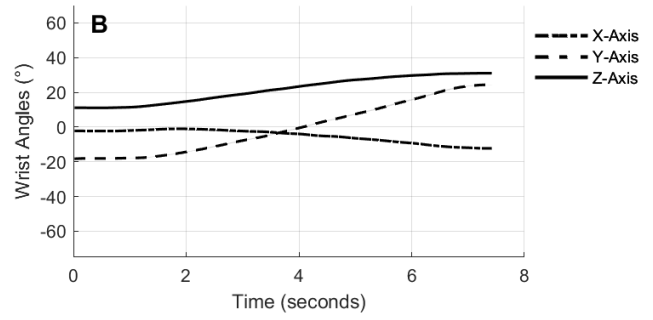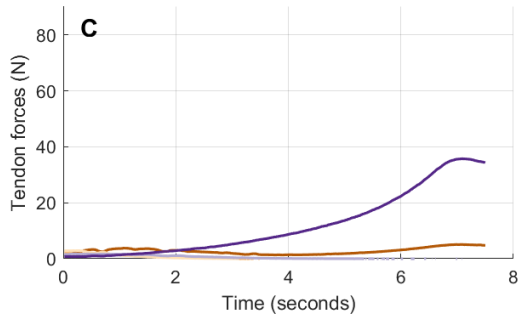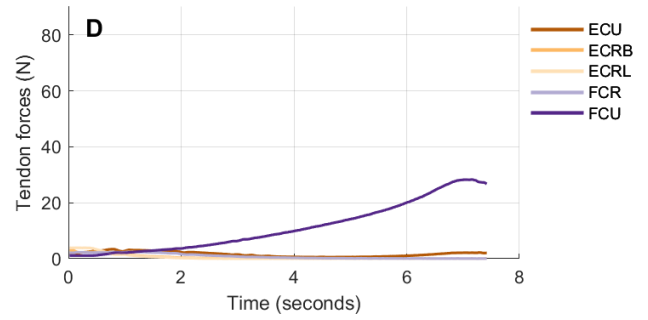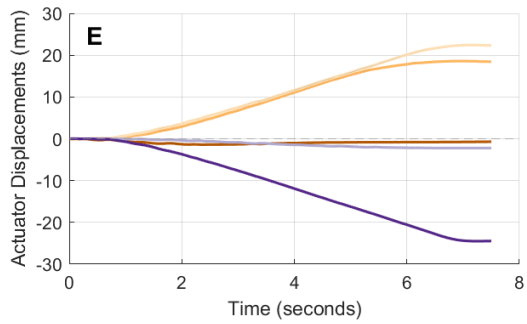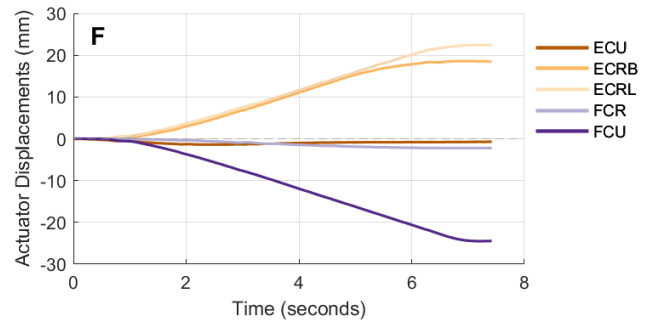

Figure S19: Average ulnar flexion trial of specimen 3.

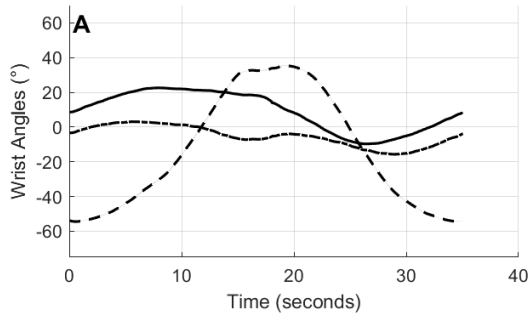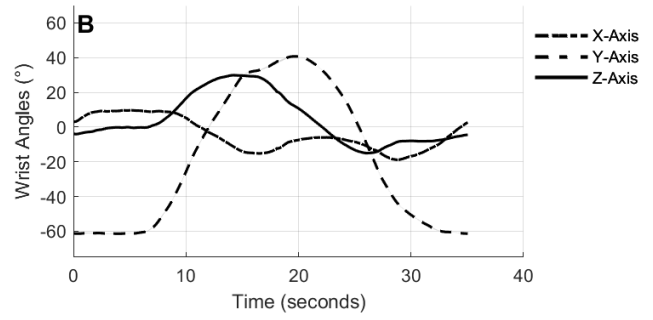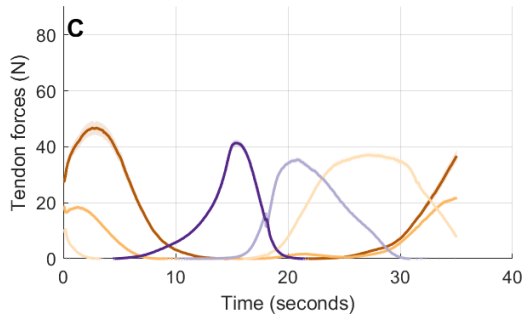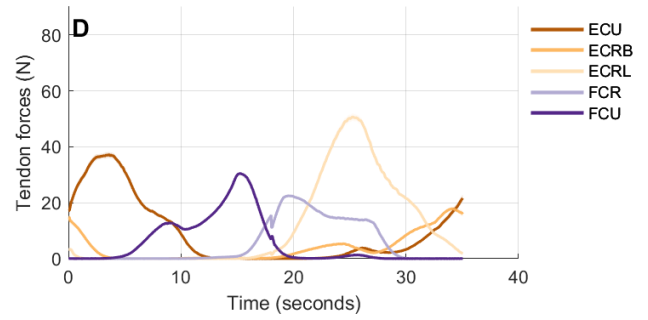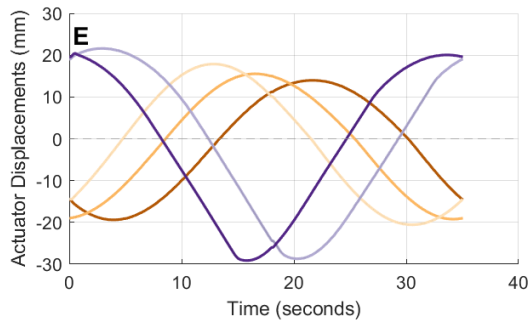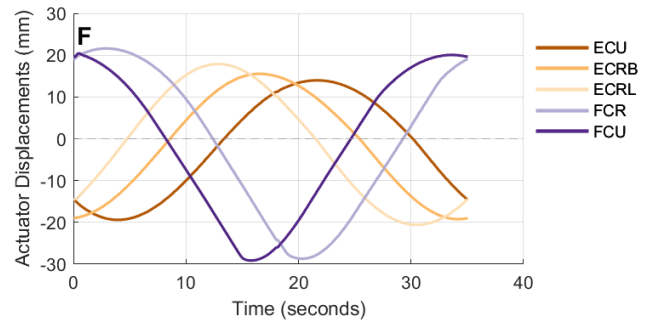

Figure S20: Average circumduction trial of specimen 3.

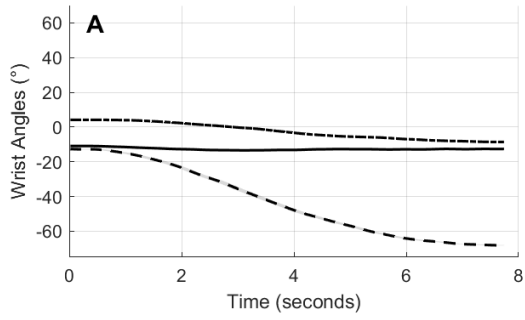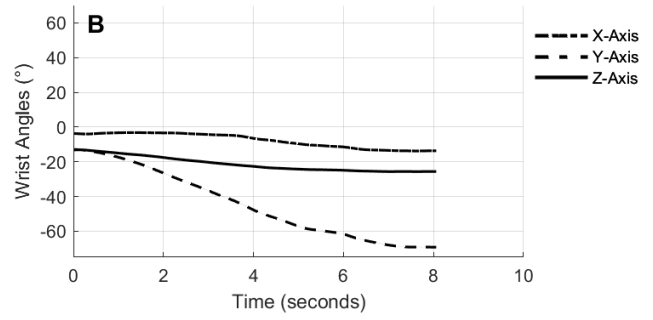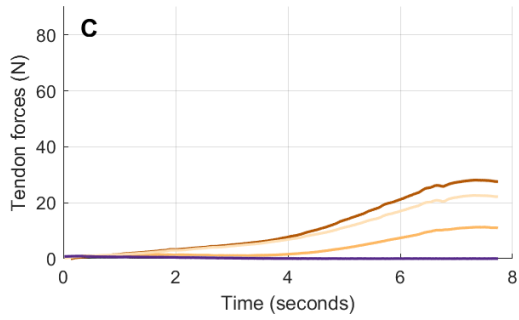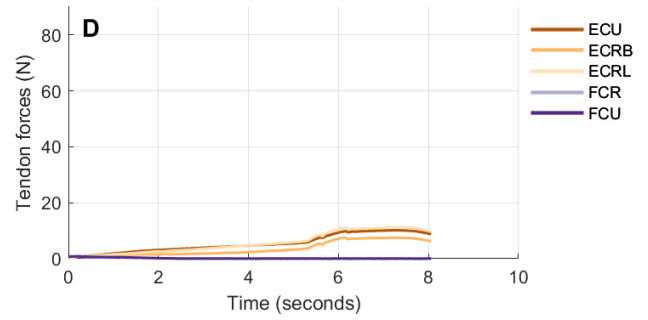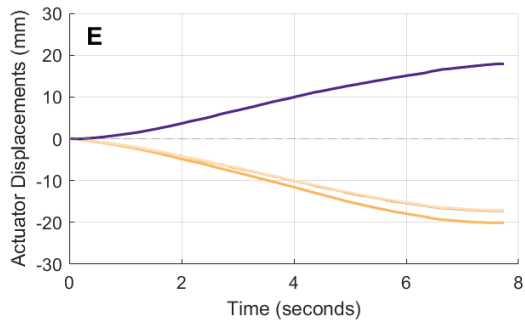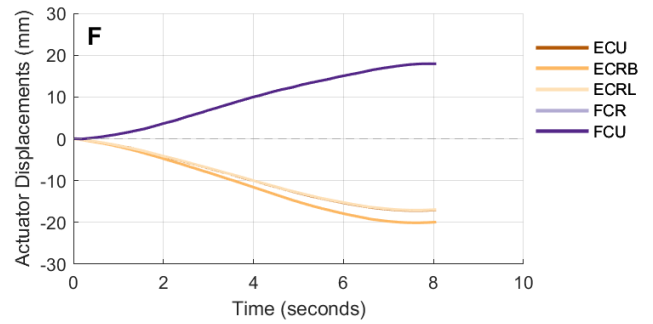

Figure S21: Average extension trial of specimen 4.



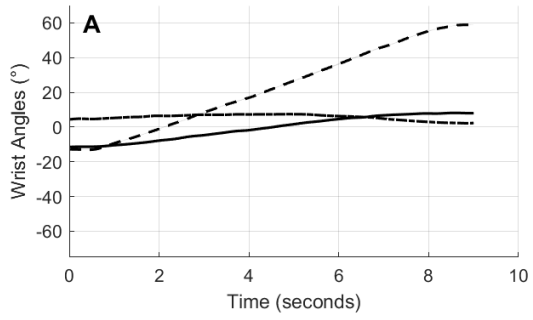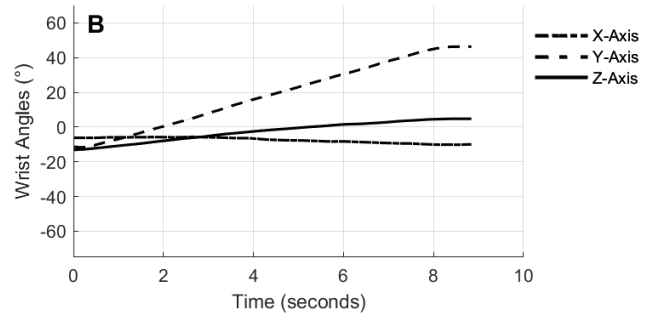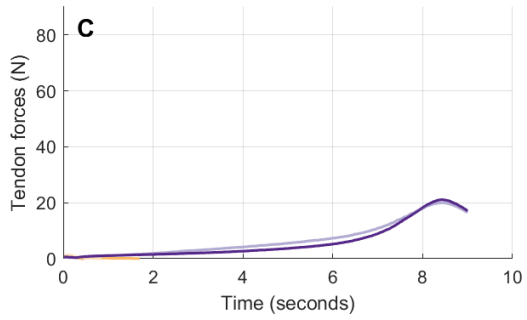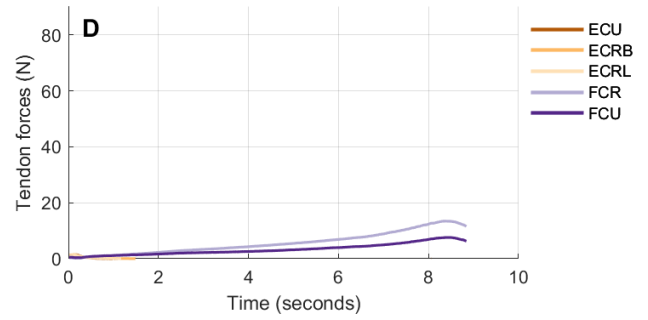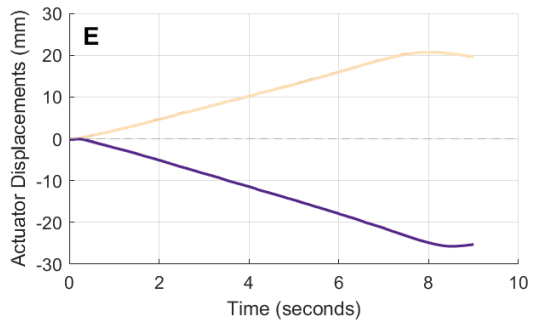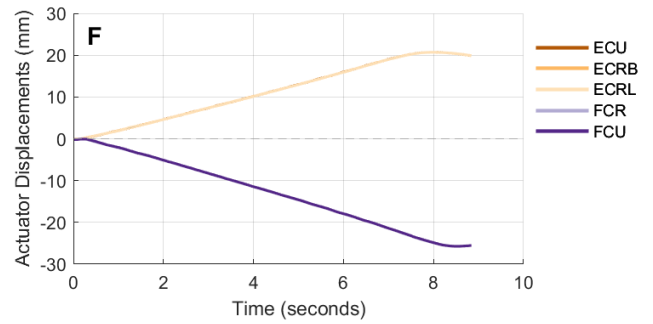

Figure S22: Average flexion trial of specimen 4.

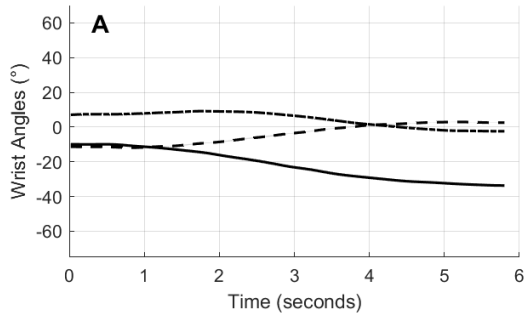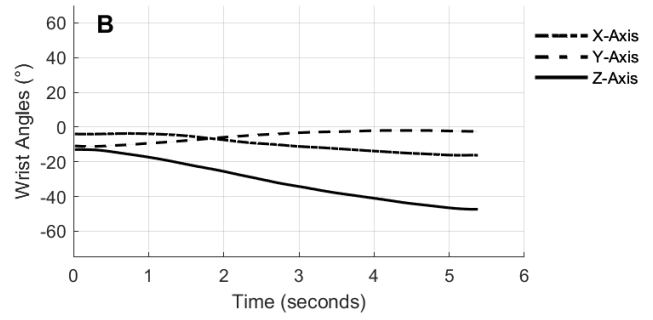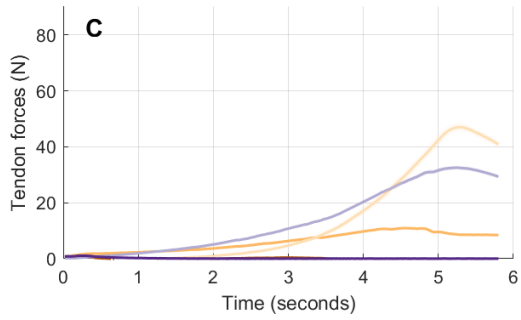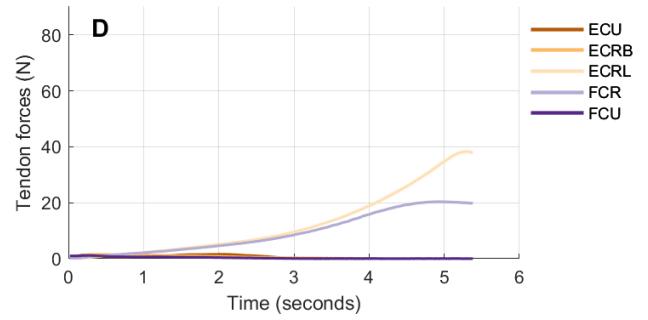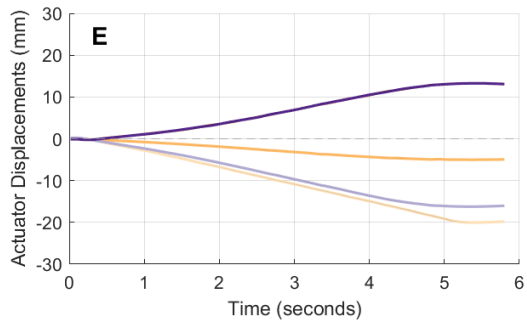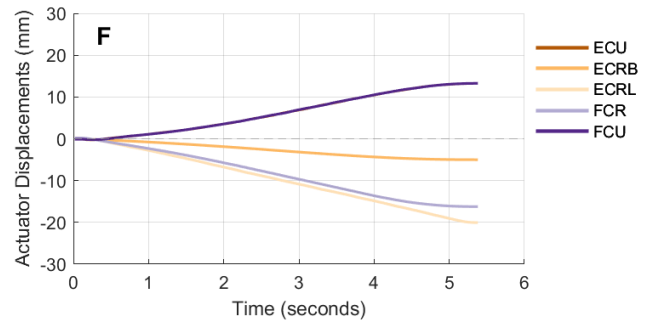

Figure S23: Average radial deviation trial of specimen 4.

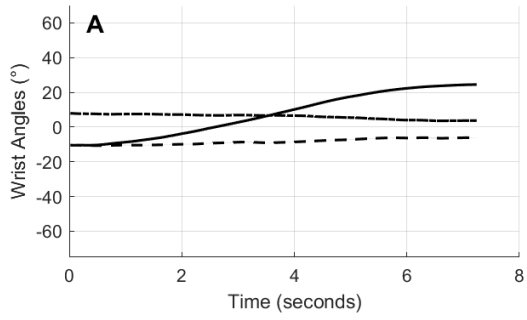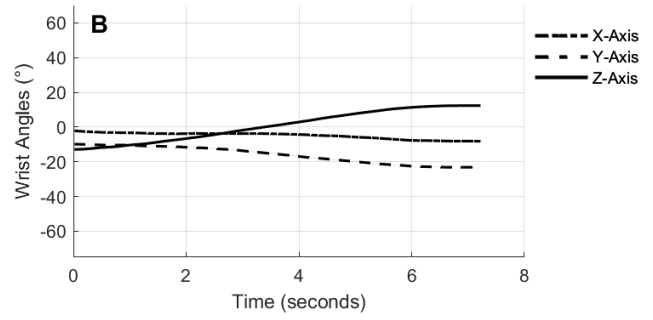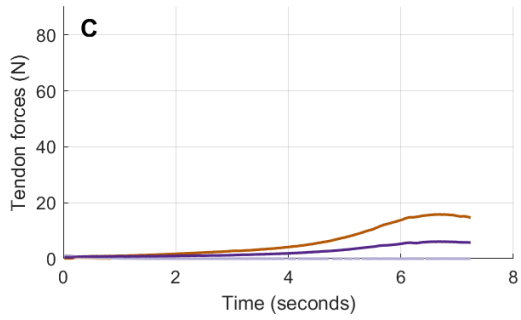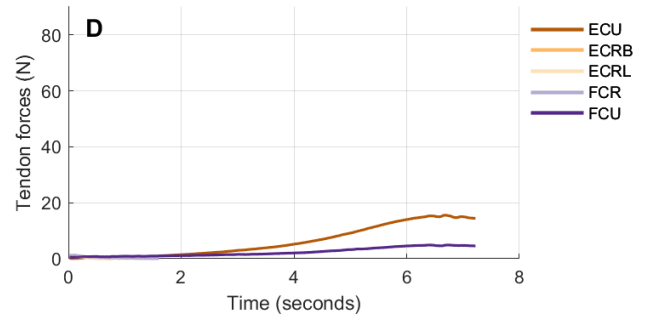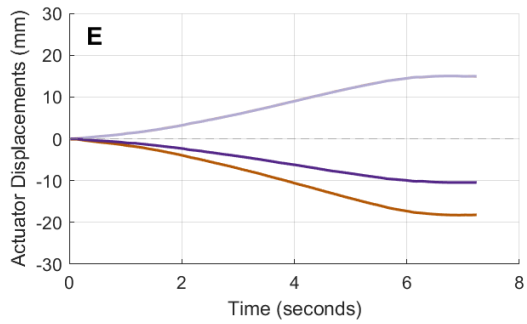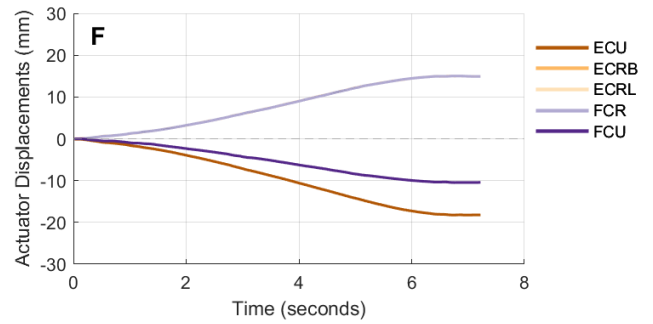

Figure S24: Average ulnar deviation trial of specimen 4.

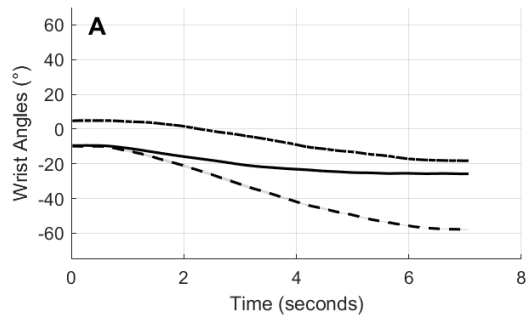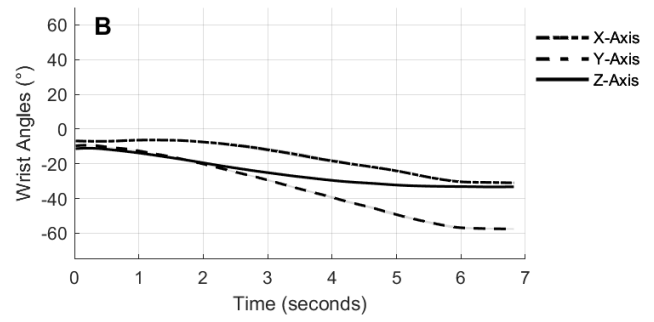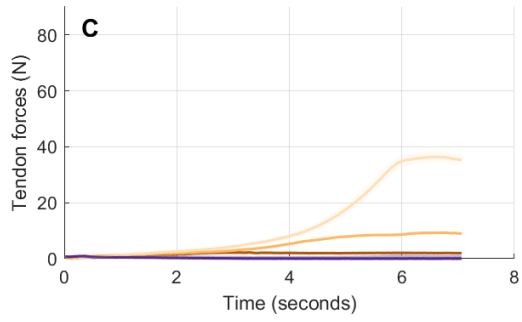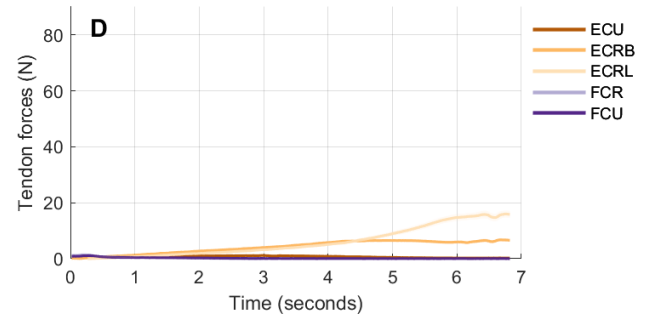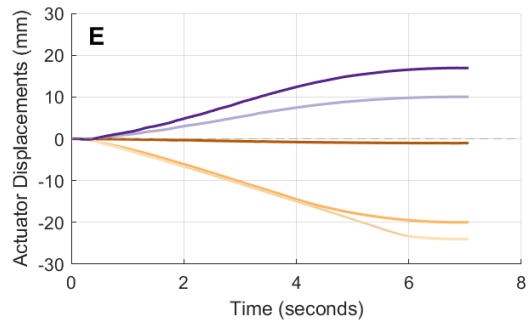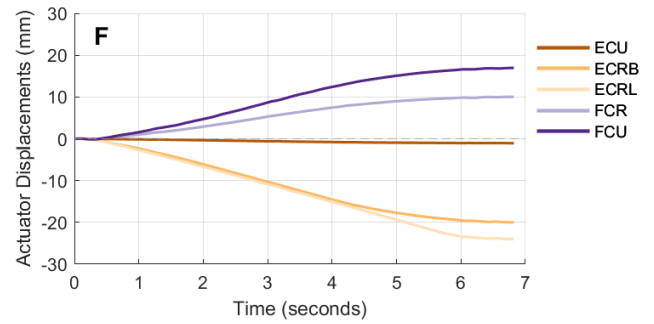

Figure S25: Average radial extension trial of specimen 4.

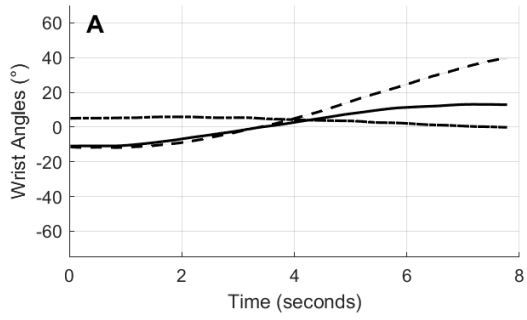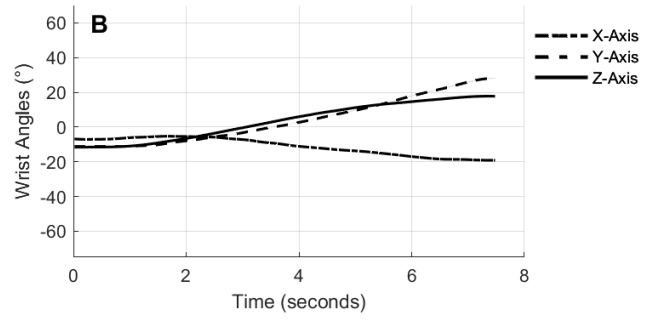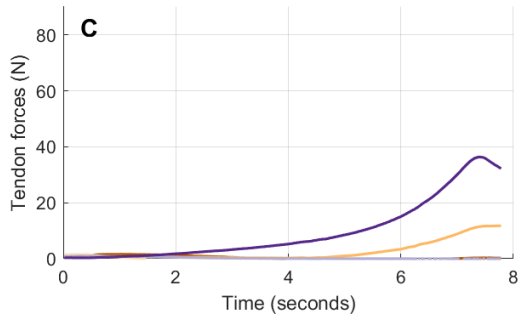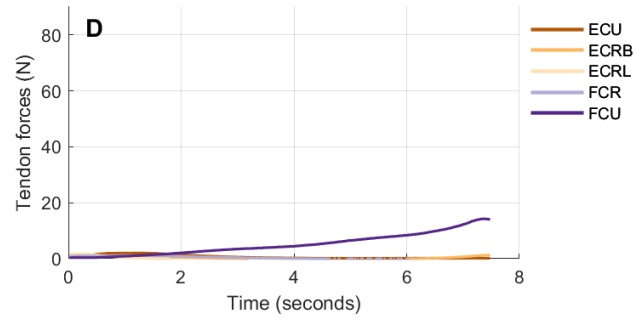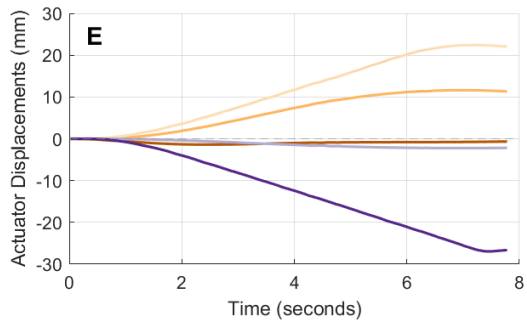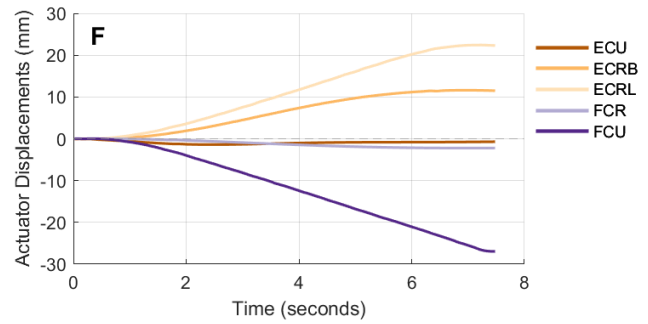

Figure S26: Average ulnar flexion trial of specimen 4.

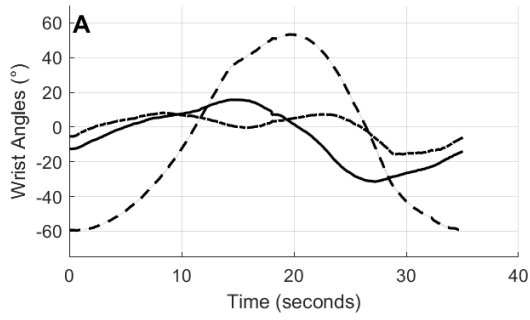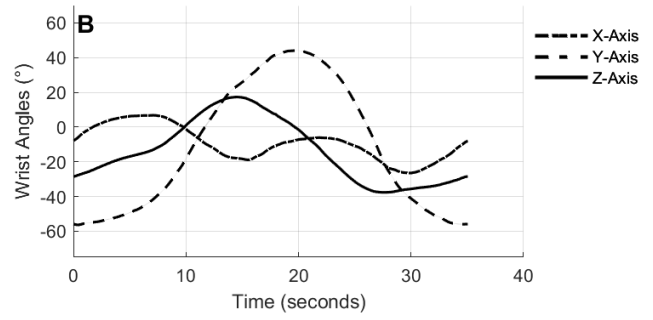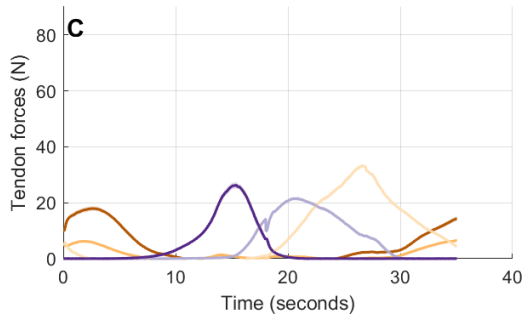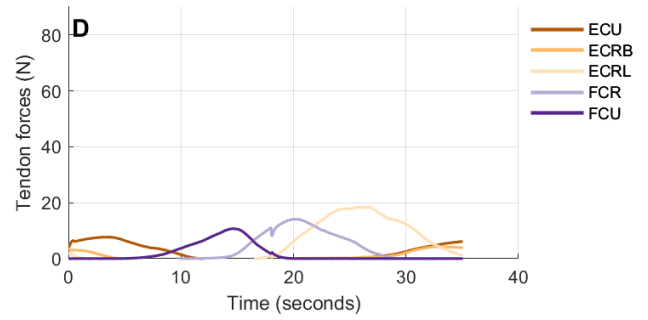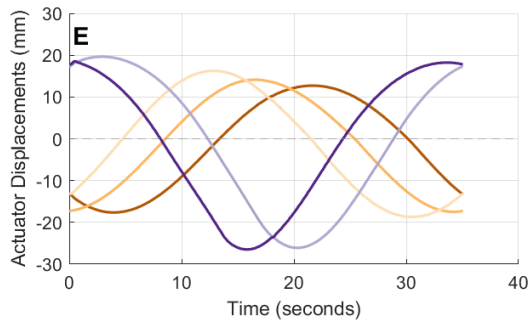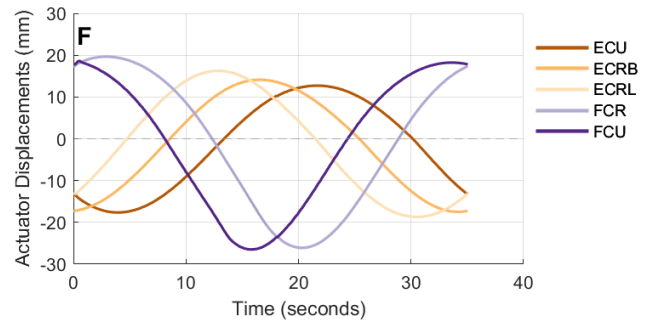

Figure S27: Average circumduction trial of specimen 4.

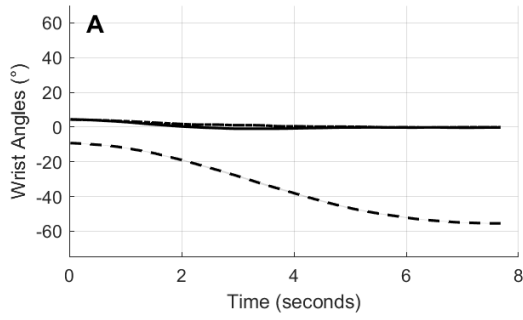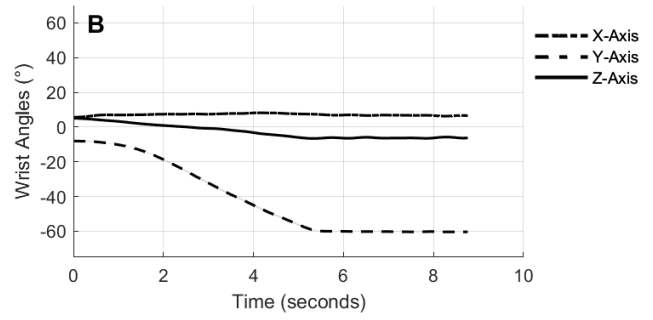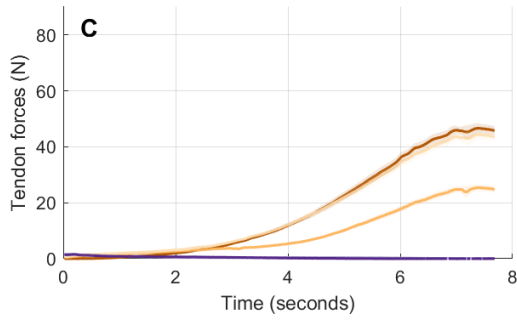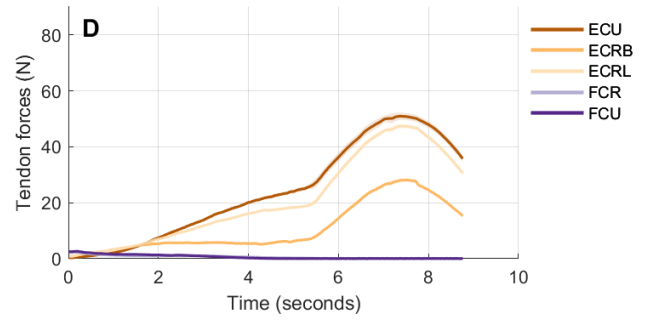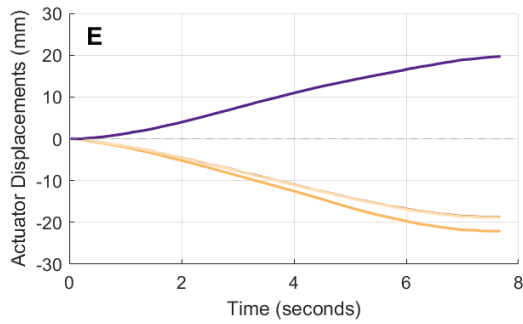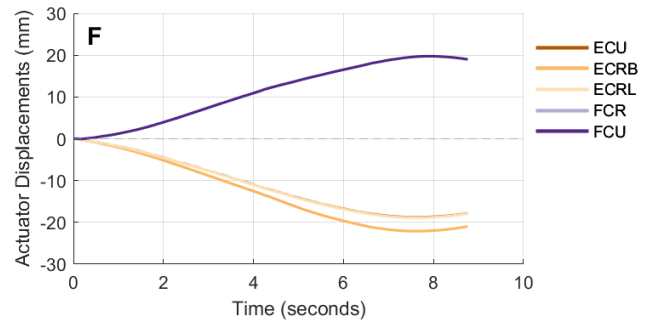

Figure S28: Average extension trial of specimen 5.

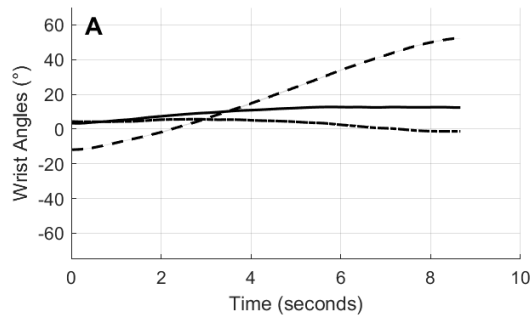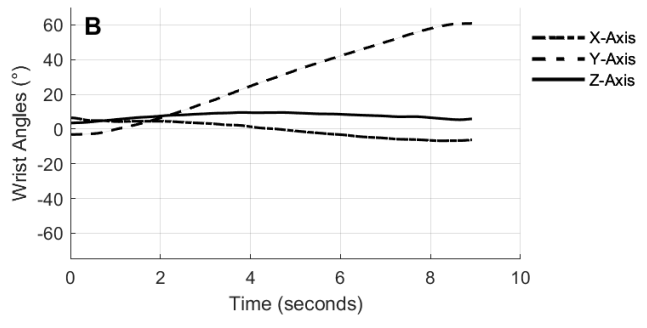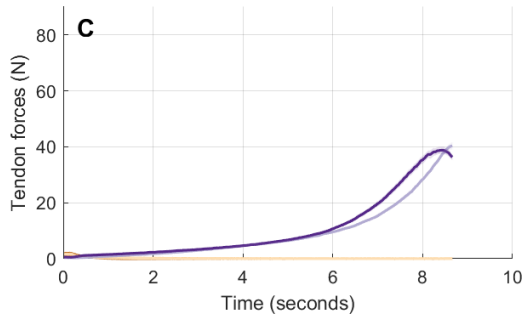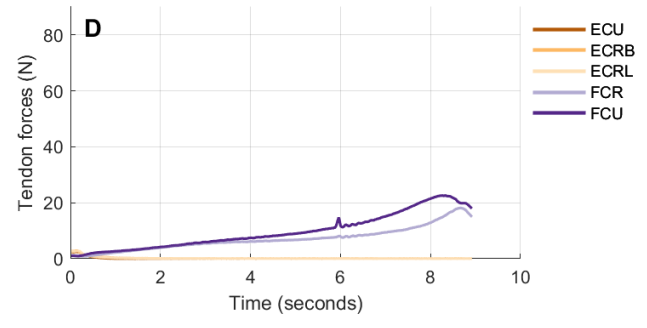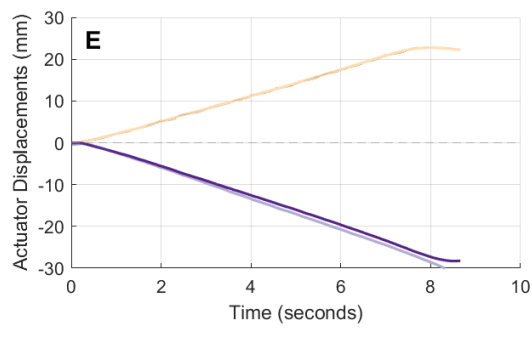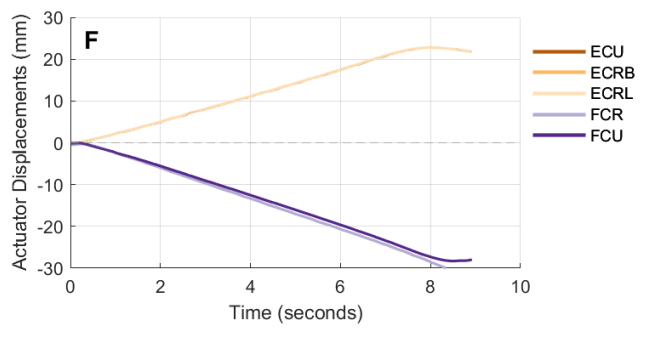

Figure S29: Average flexion trial of specimen 5.



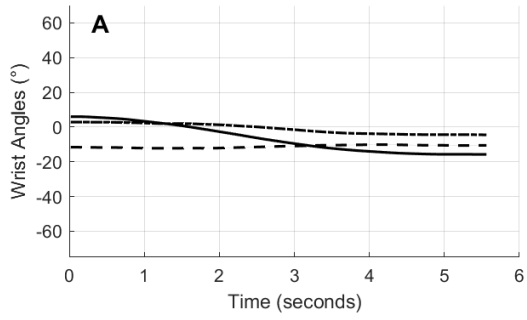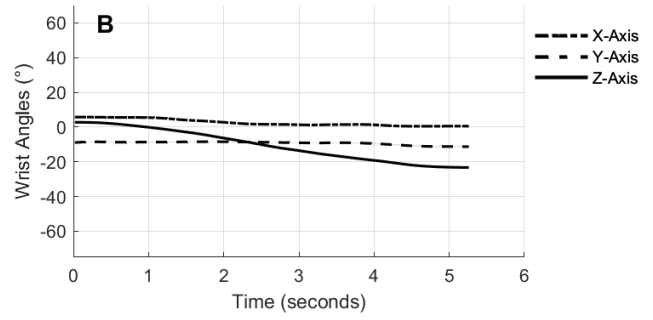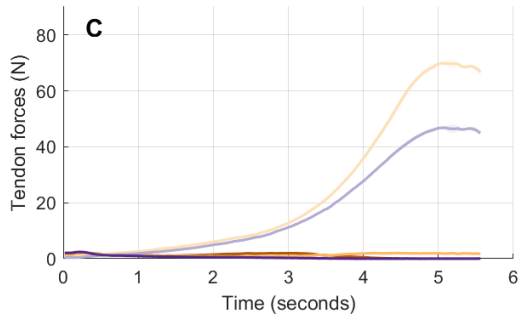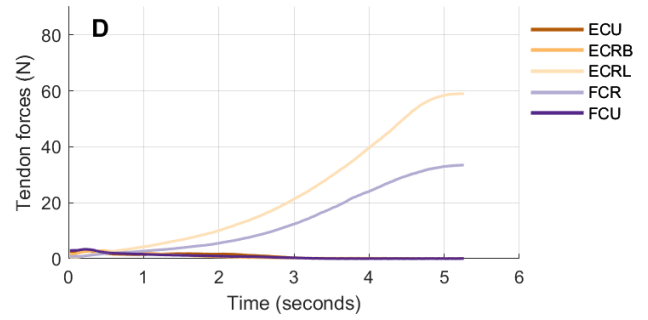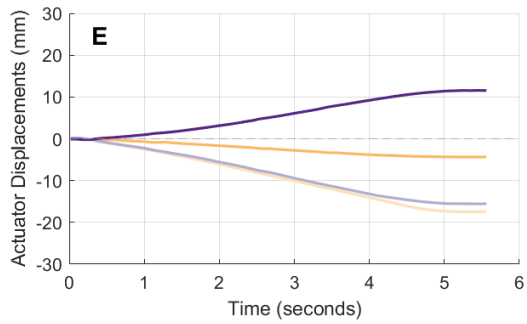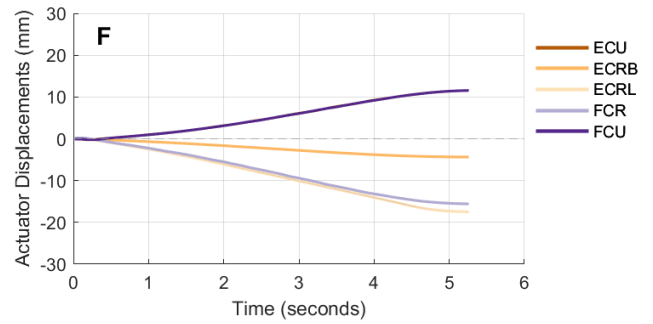

Figure S30: Average radial deviation trial of specimen 5.

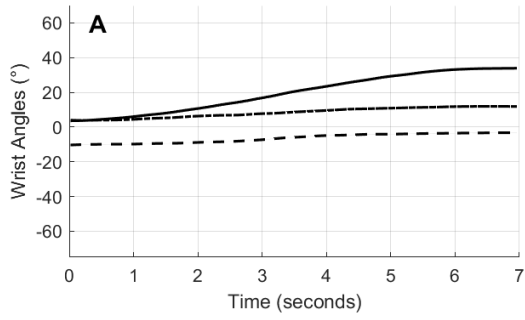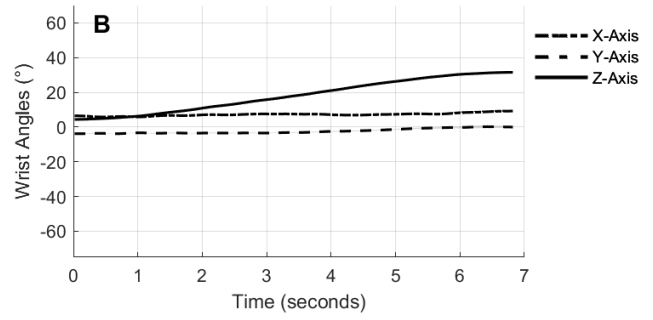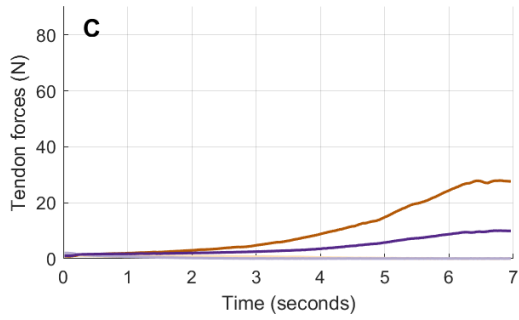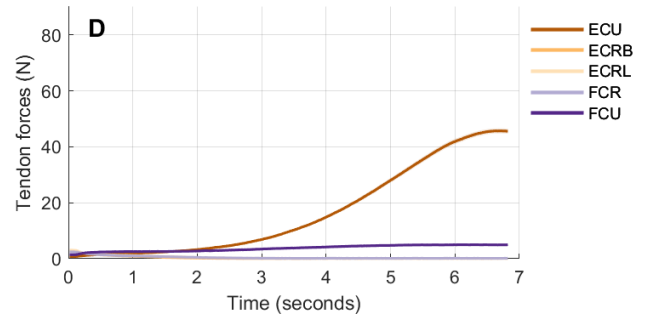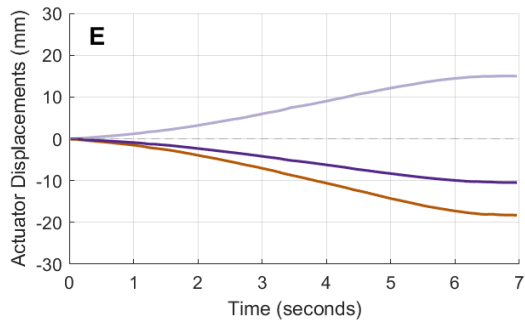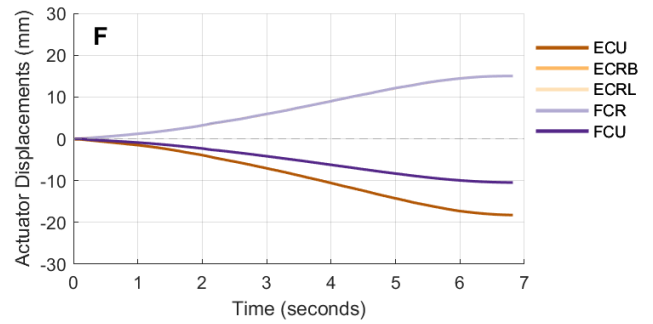

Figure S31: Average ulnar deviation trial of specimen 5.

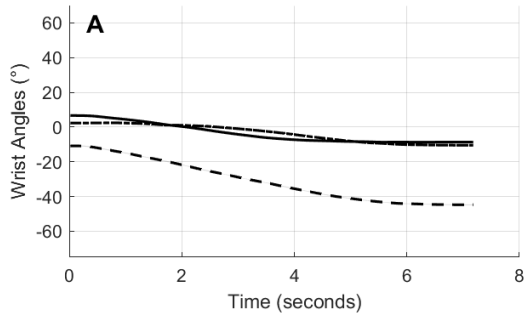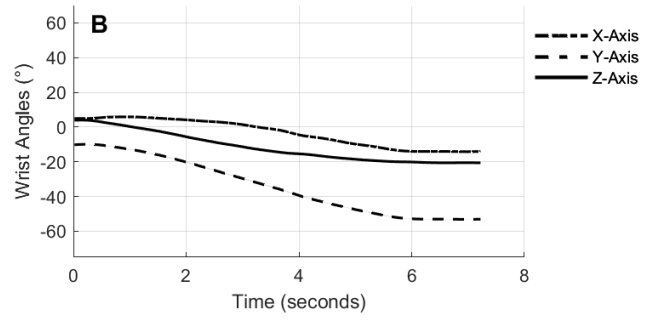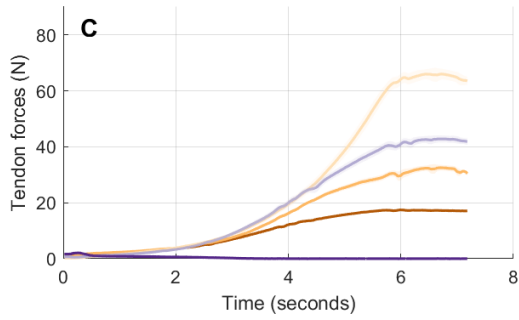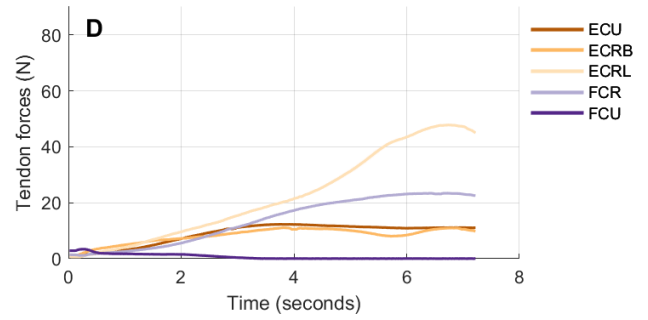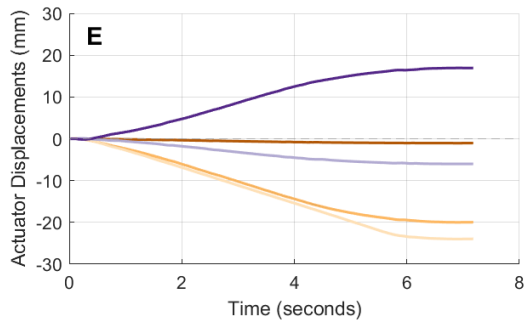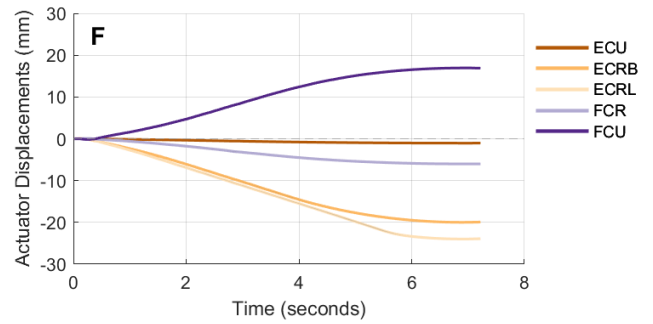

Figure S32: Average radial extension trial of specimen 5.

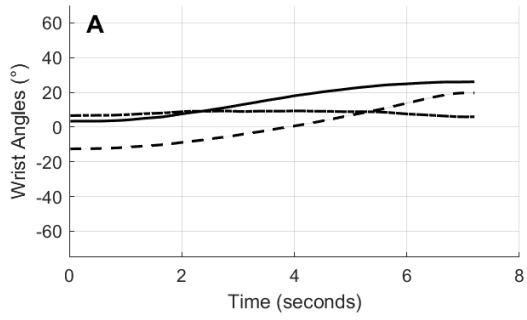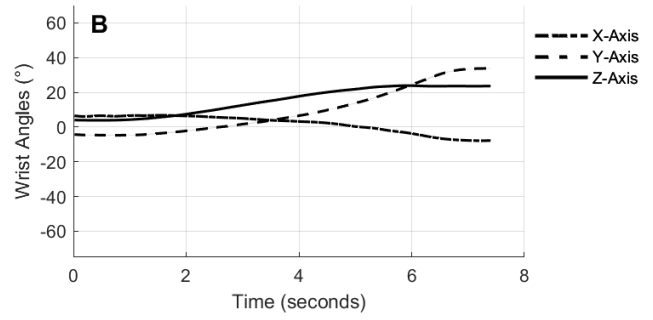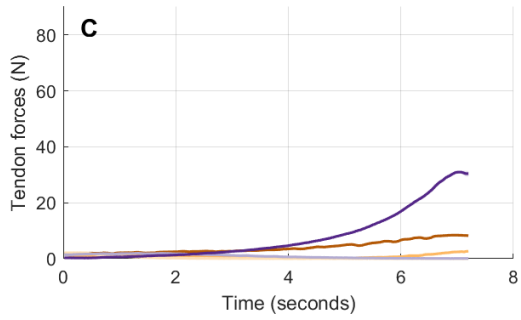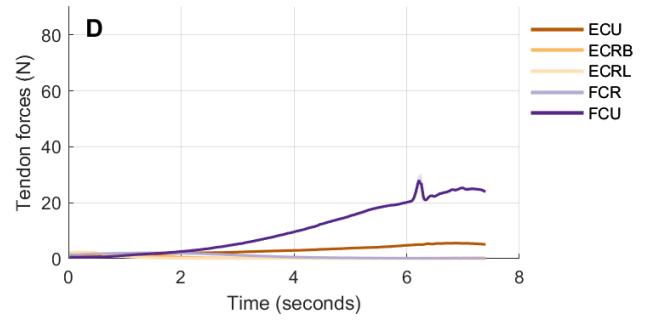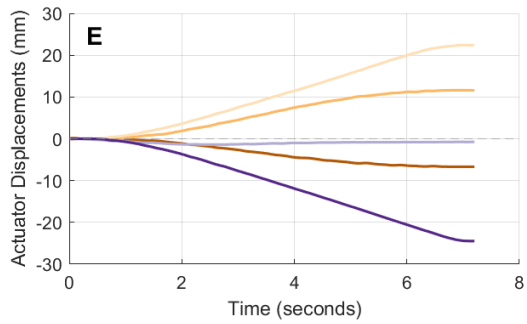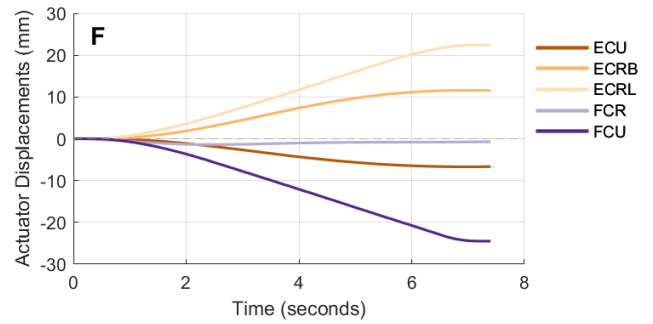

Figure S33: Average ulnar flexion trial of specimen 5.

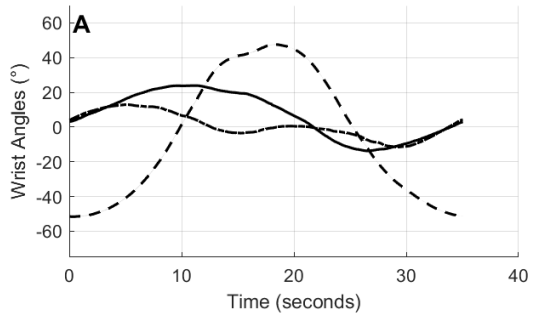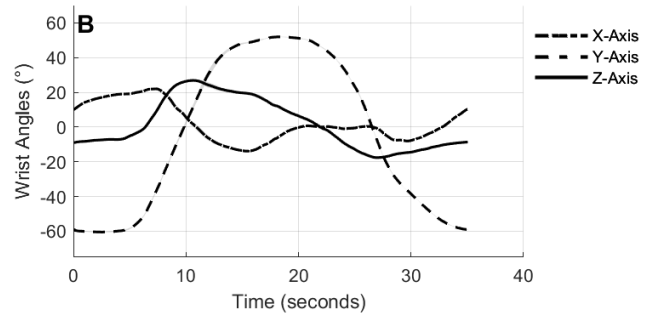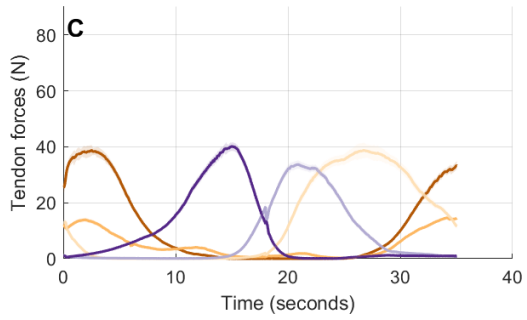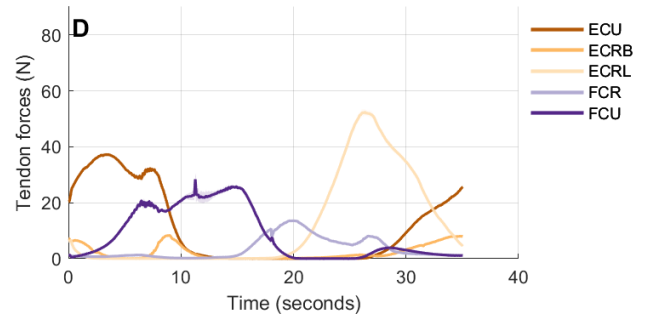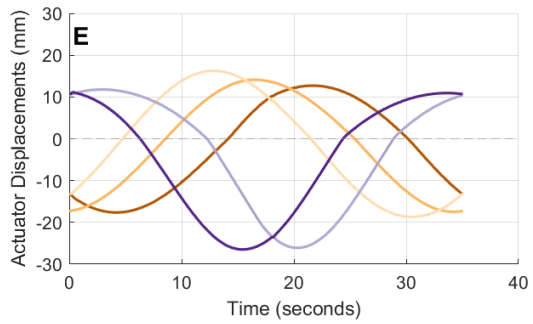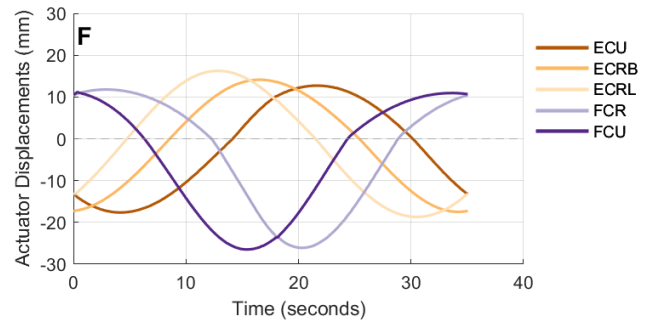

Figure S34: Average circumduction trial of specimen 5.

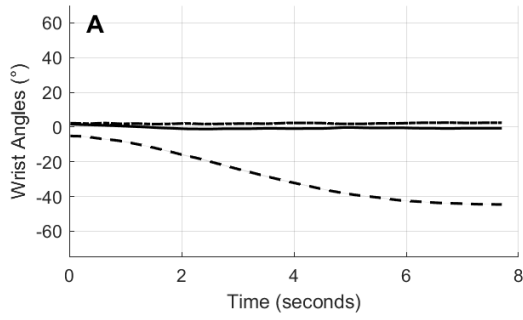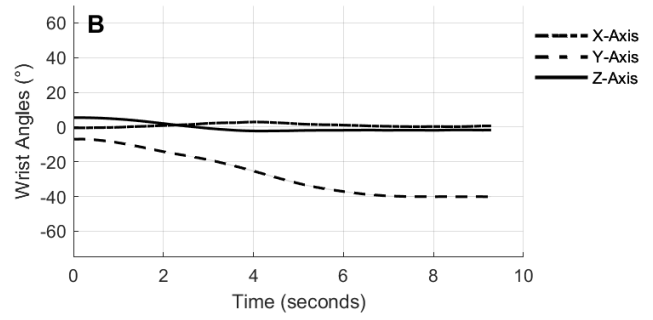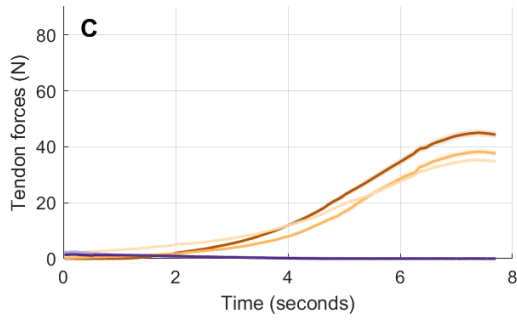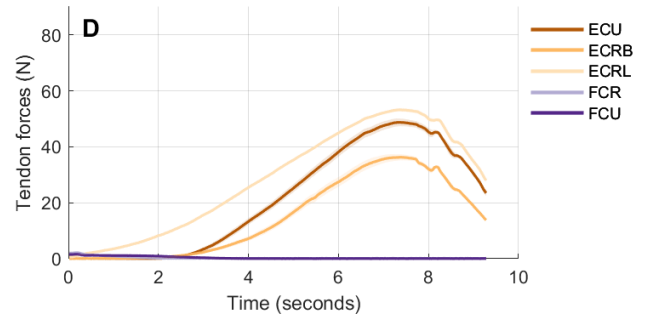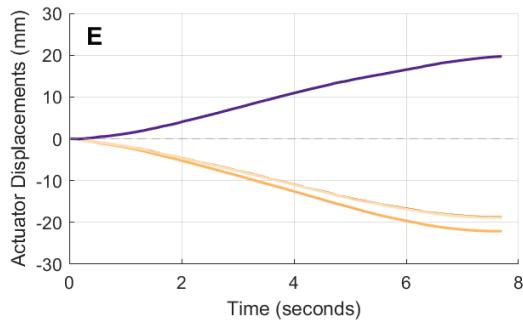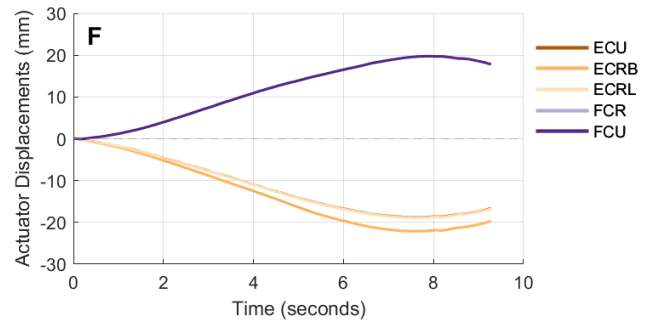

Figure S35: Average extension trial of specimen 6.

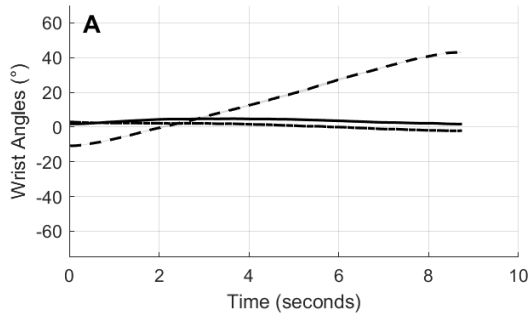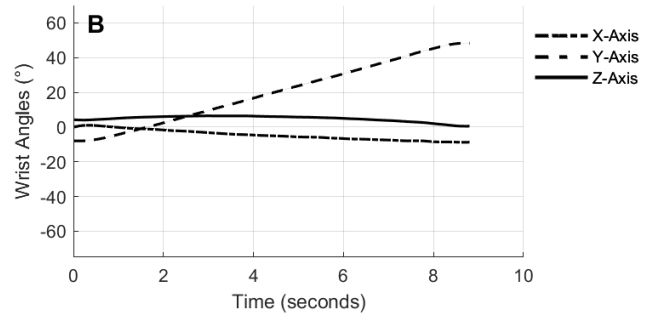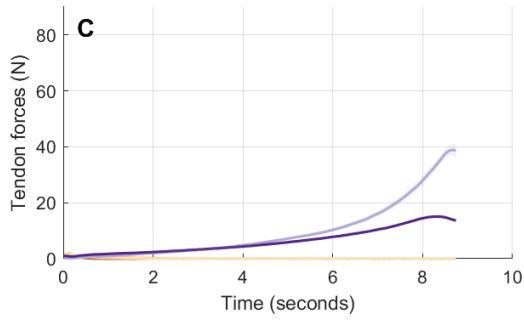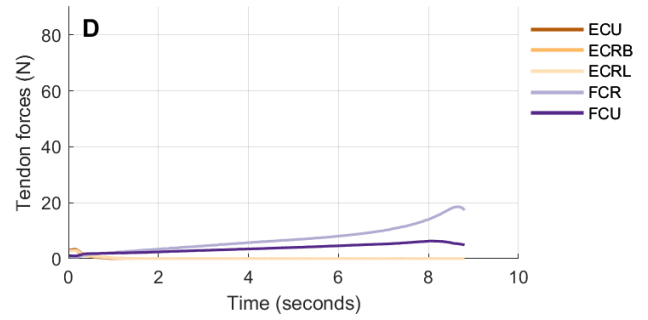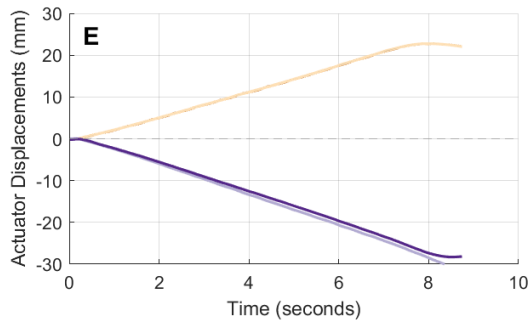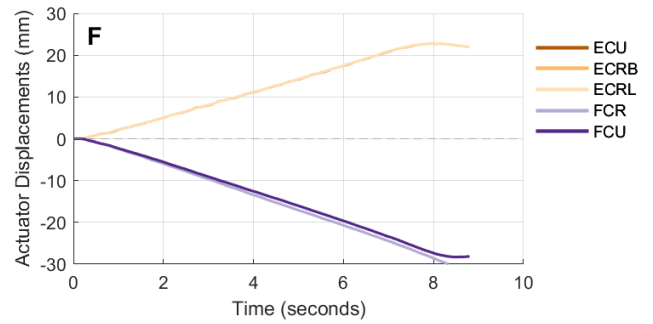

Figure S36: Average flexion trial of specimen 6.

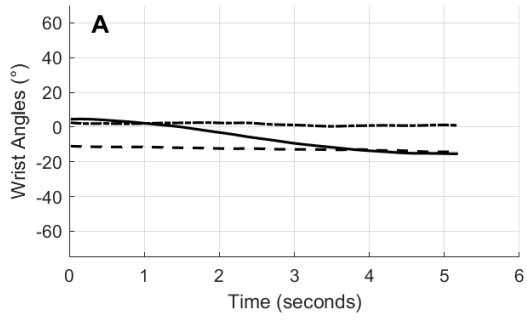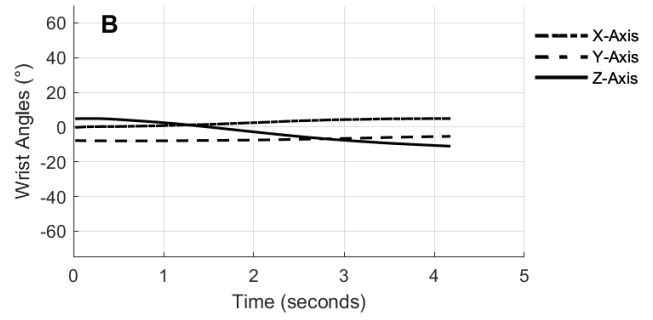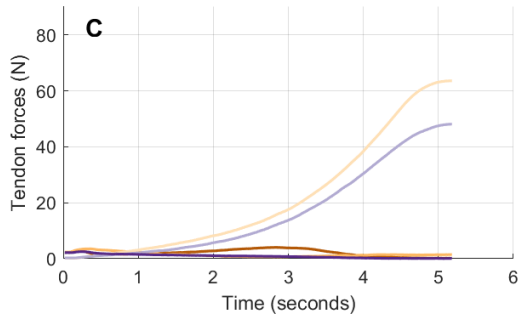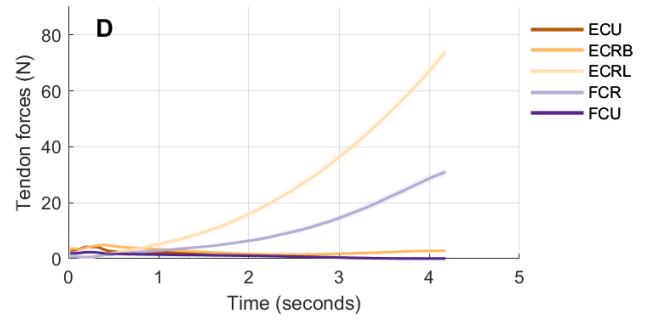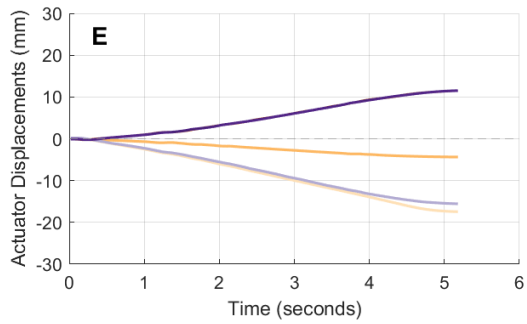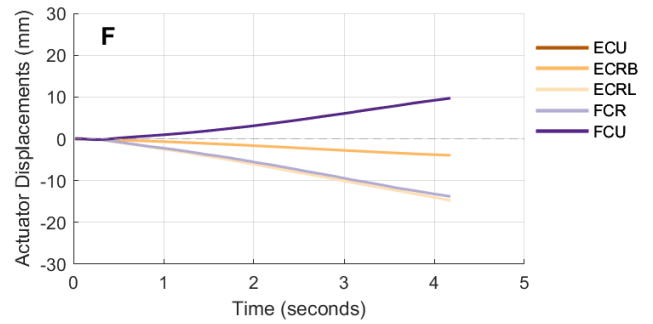

Figure S37: Average radial deviation trial of specimen 6.



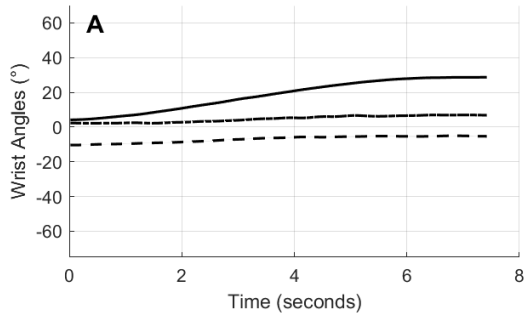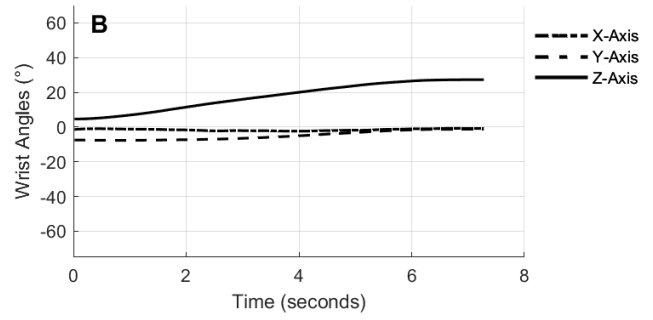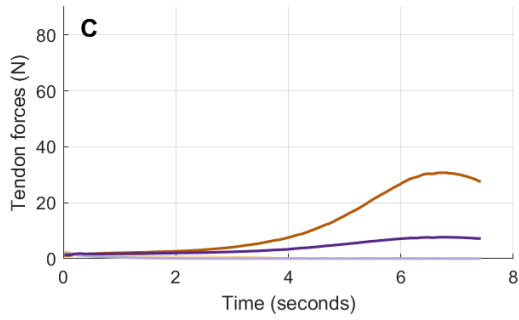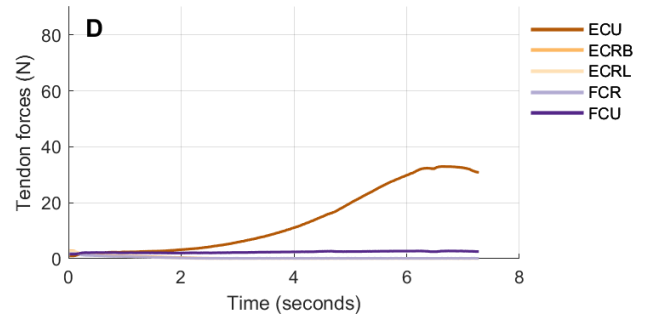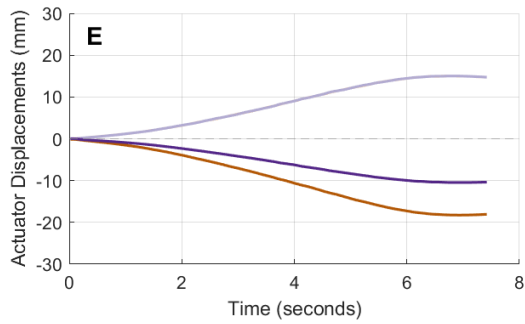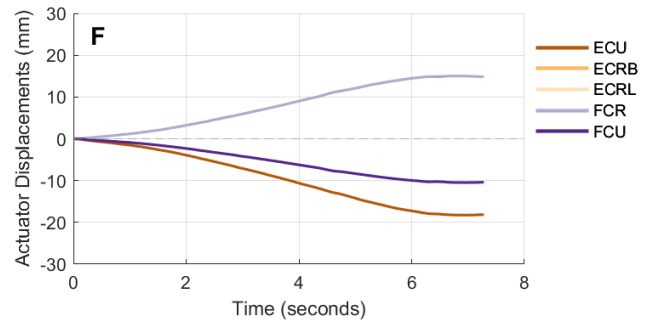

Figure S38: Average ulnar deviation trial of specimen 6.

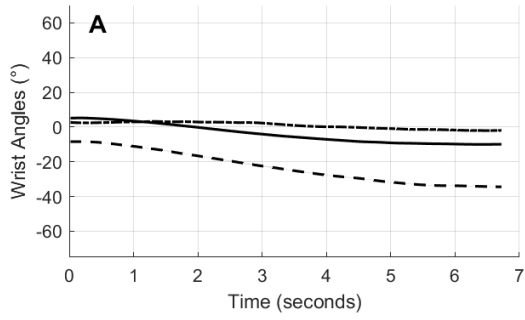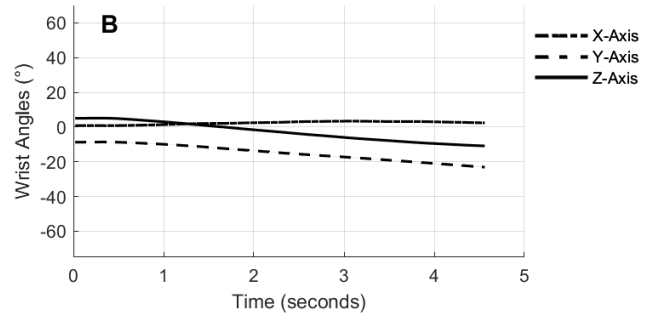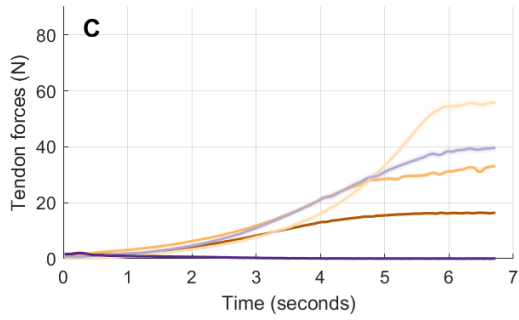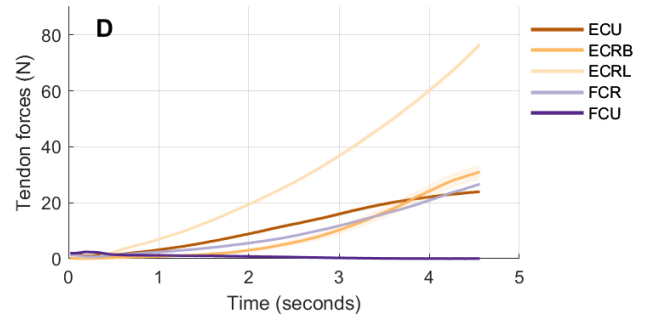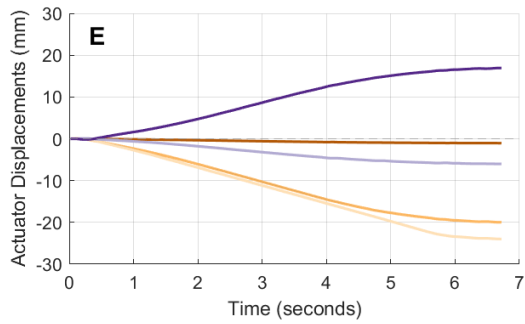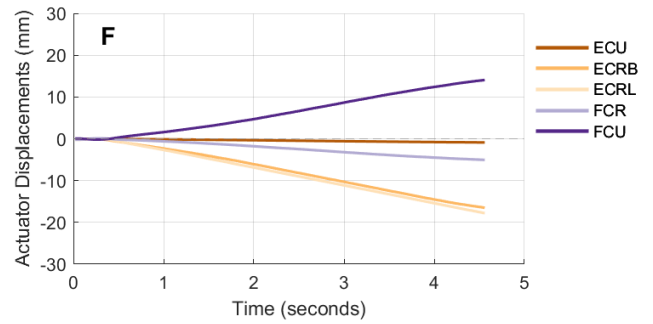

Figure S39: Average radial extension trial of specimen 6.

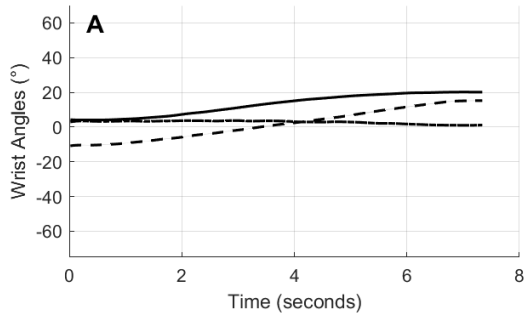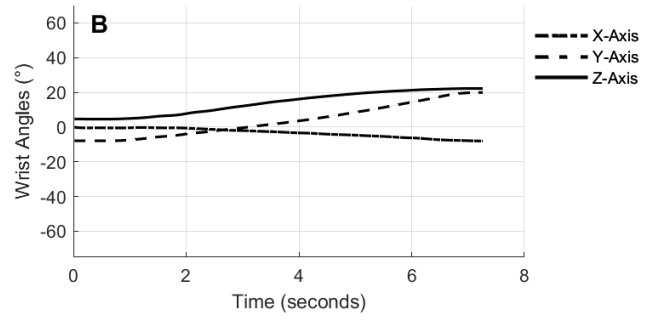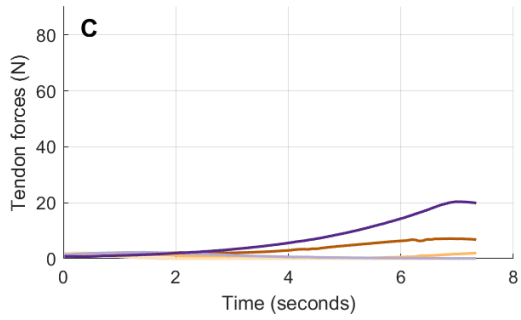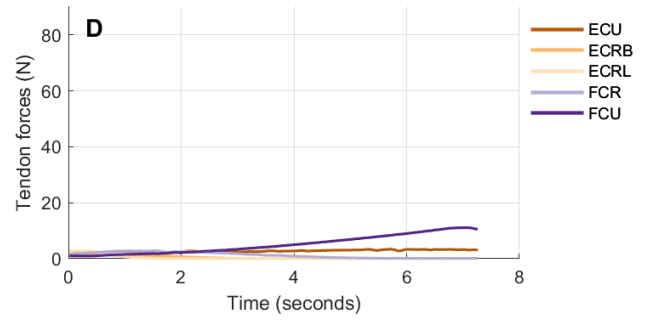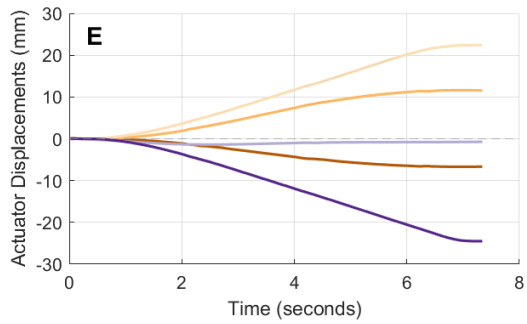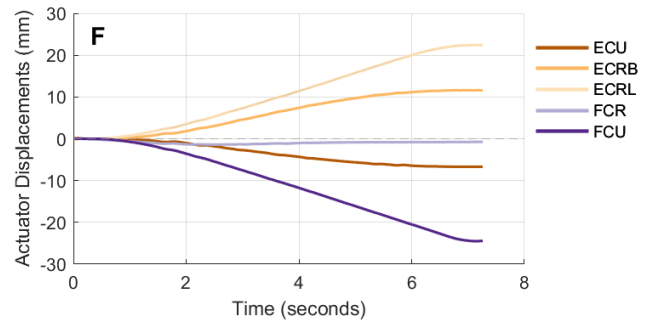

Figure S40: Average ulnar flexion trial of specimen 6.

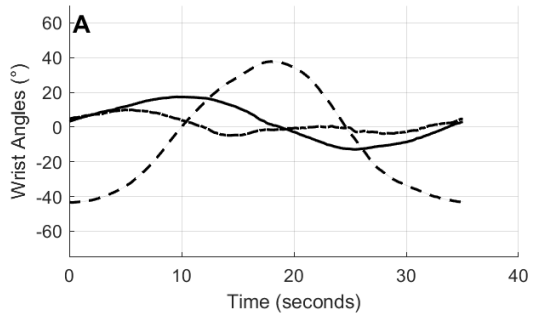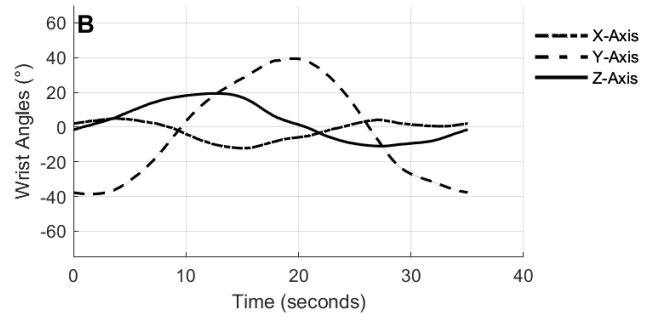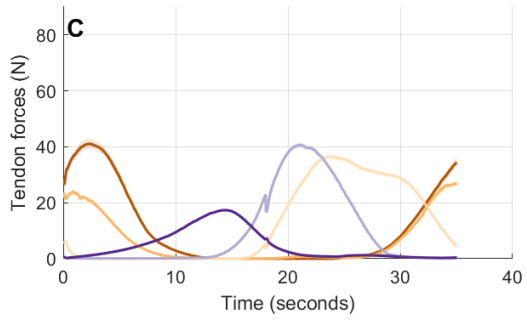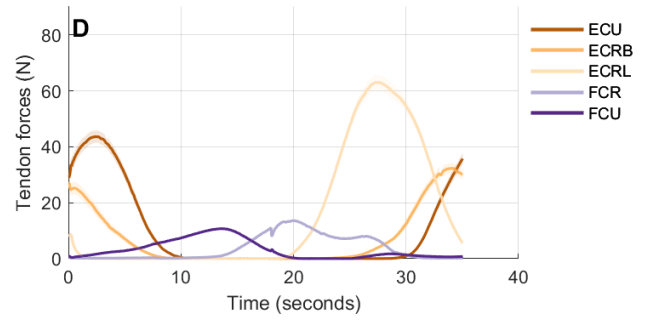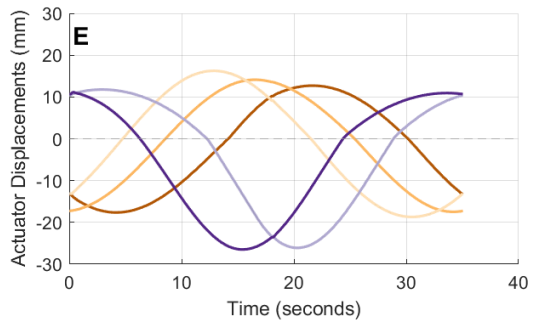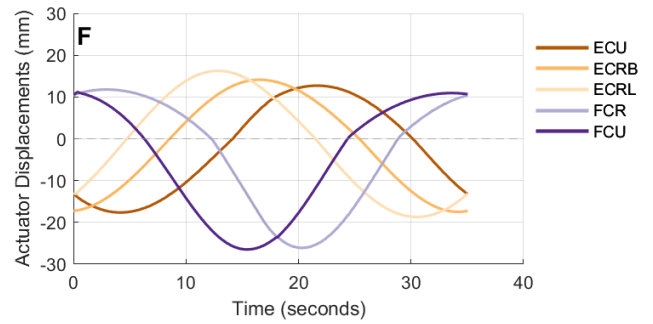

Figure S41: Average circumduction trial of specimen 6.
